# Supplementary figures and images for: Identifying Putative Causal Links between MicroRNAs and Severe COVID-19 Using Mendelian Randomization
Source: MDPI journal article supplement (doi:10.3390/cells10123504), 2021-12-11

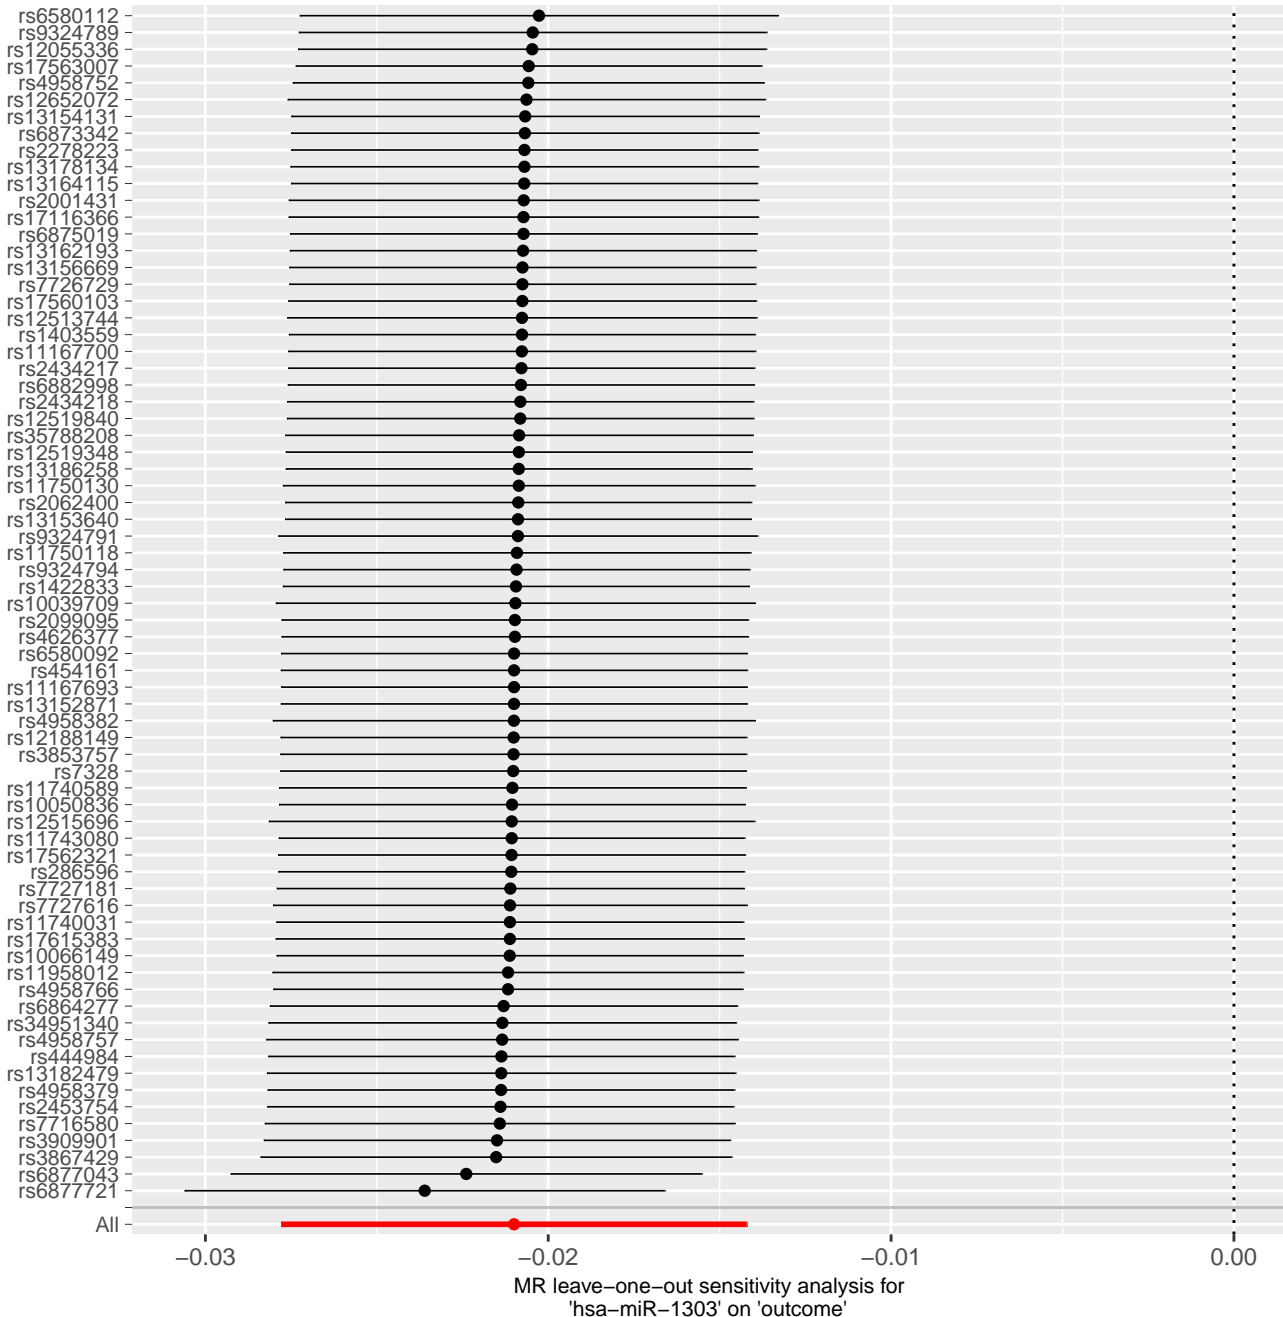

Supplement: s1 [file s1]

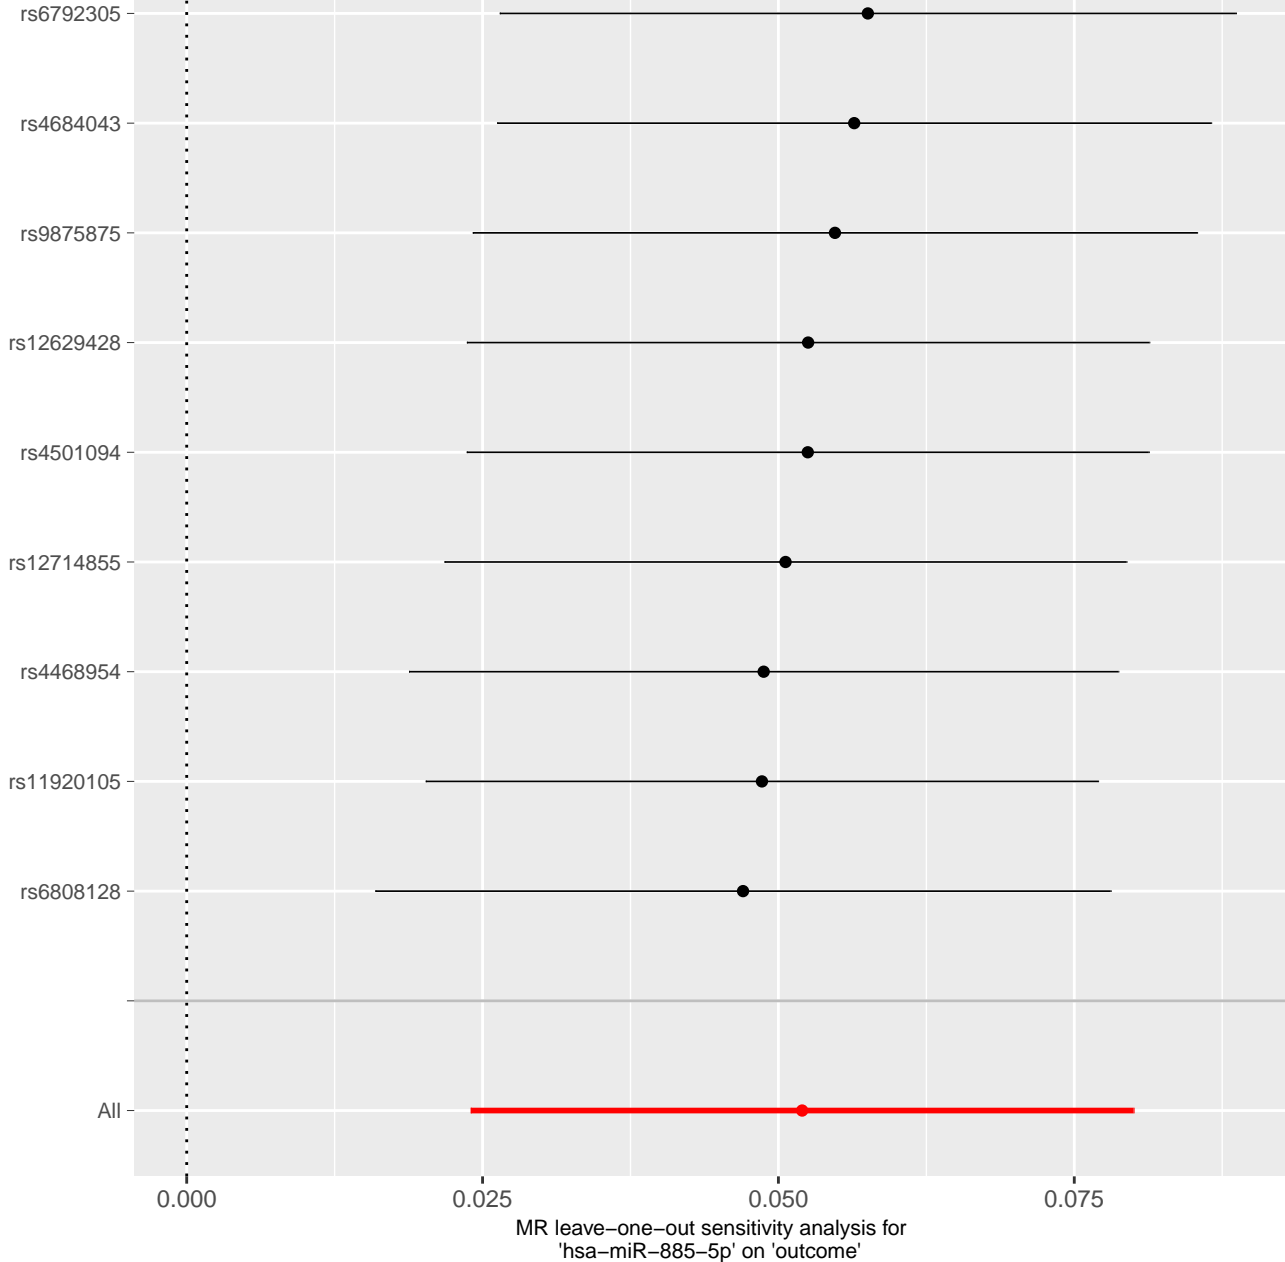

Supplement: s1 [file s1]

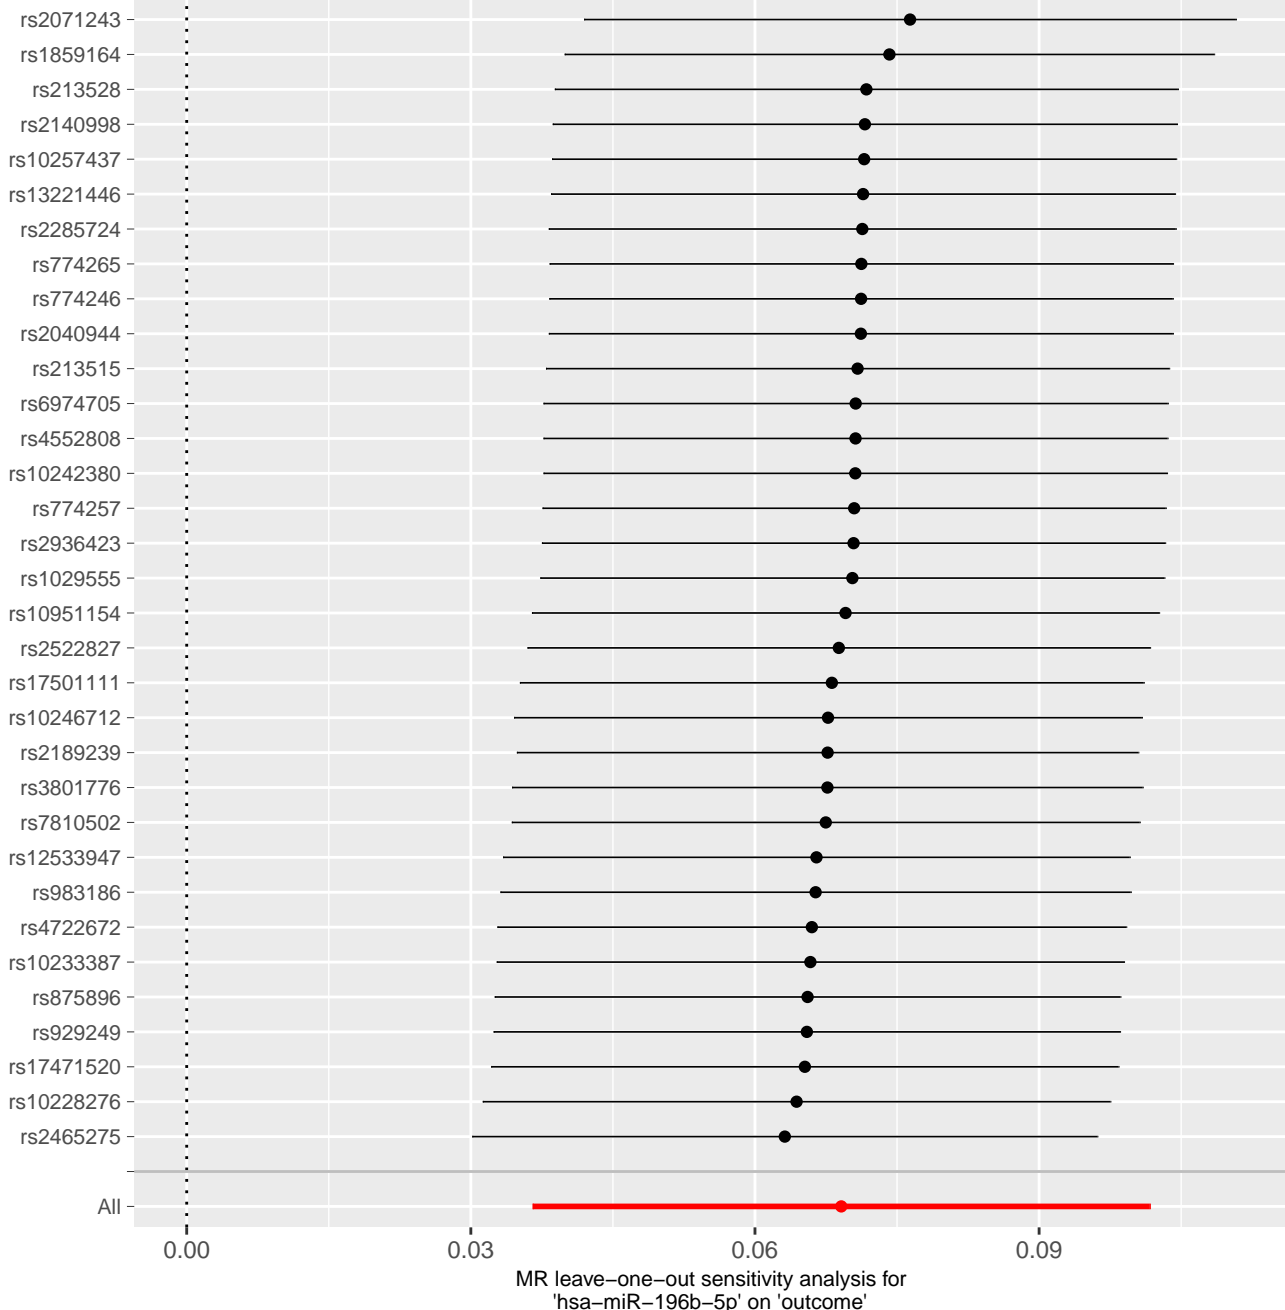

Supplement: s1 [file s1]

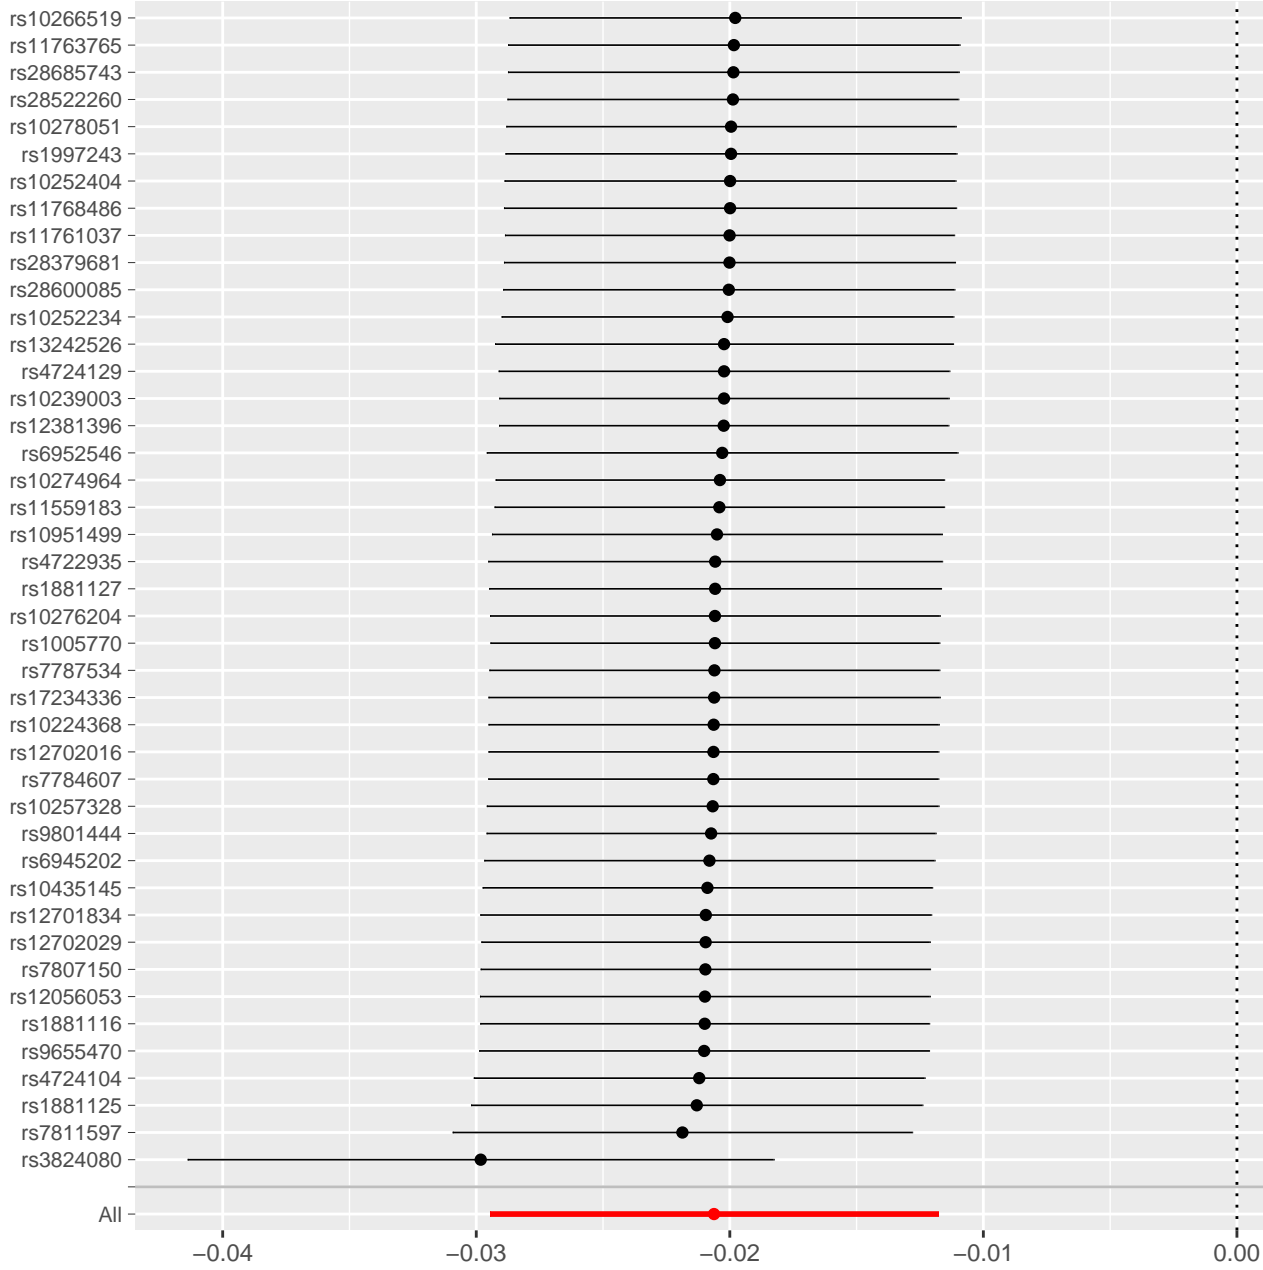

Supplement: s1 [file s1]

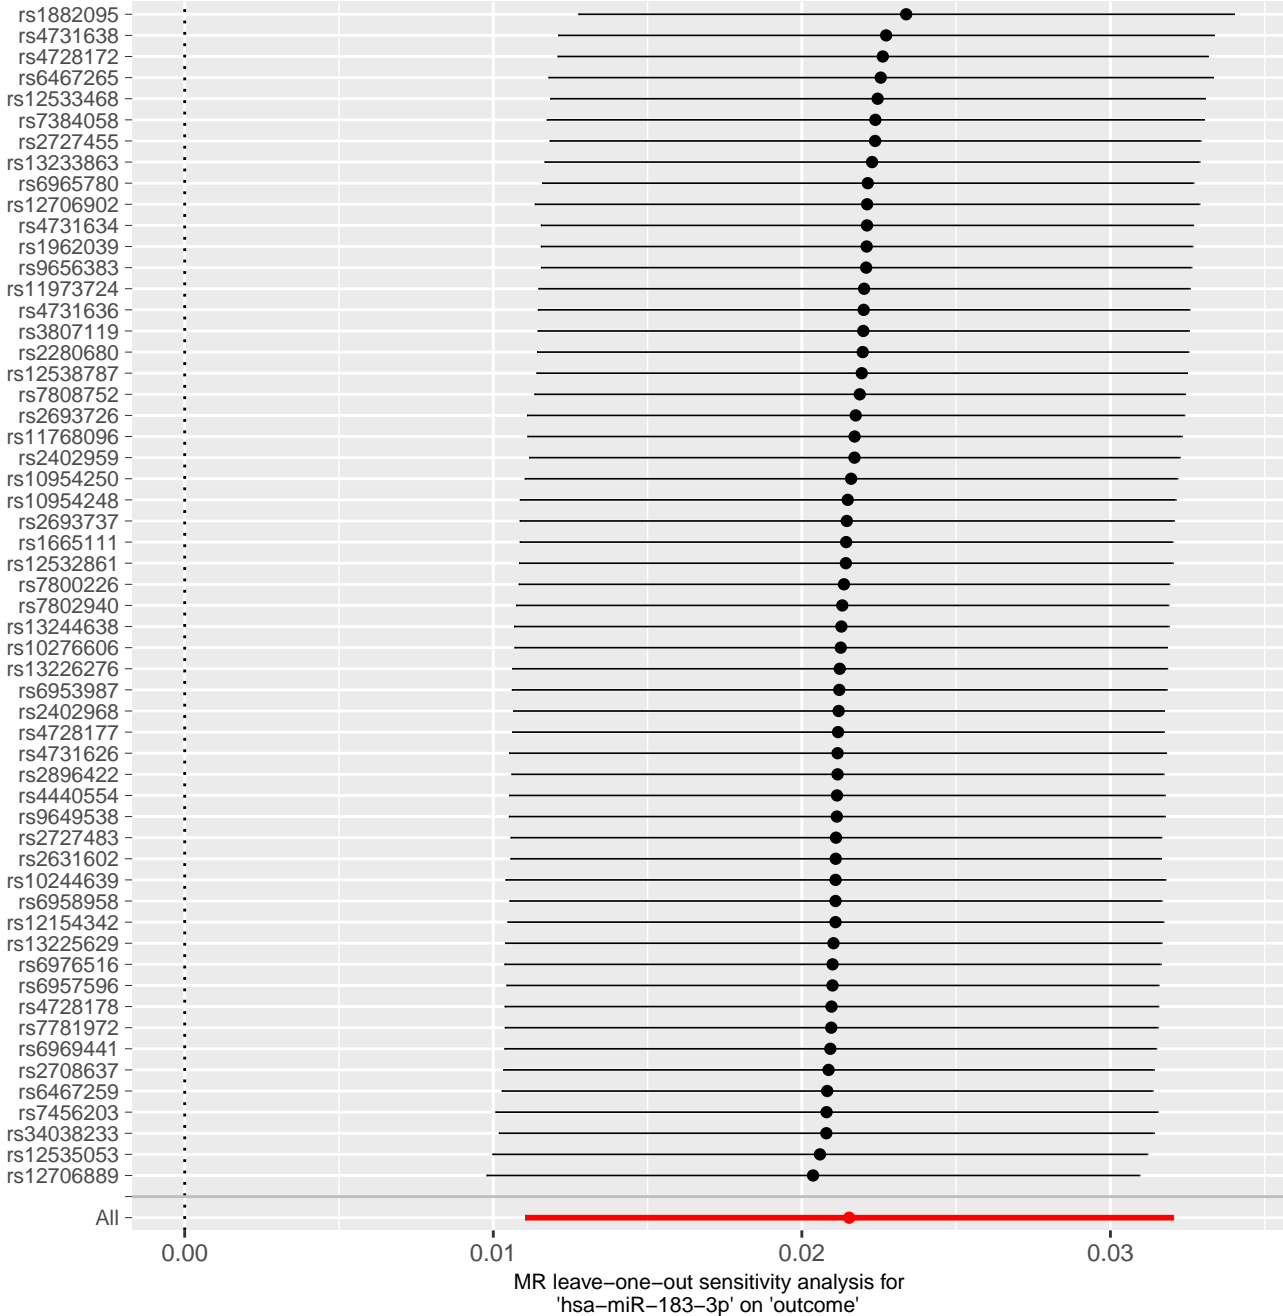

Supplement: s1 [file s1]

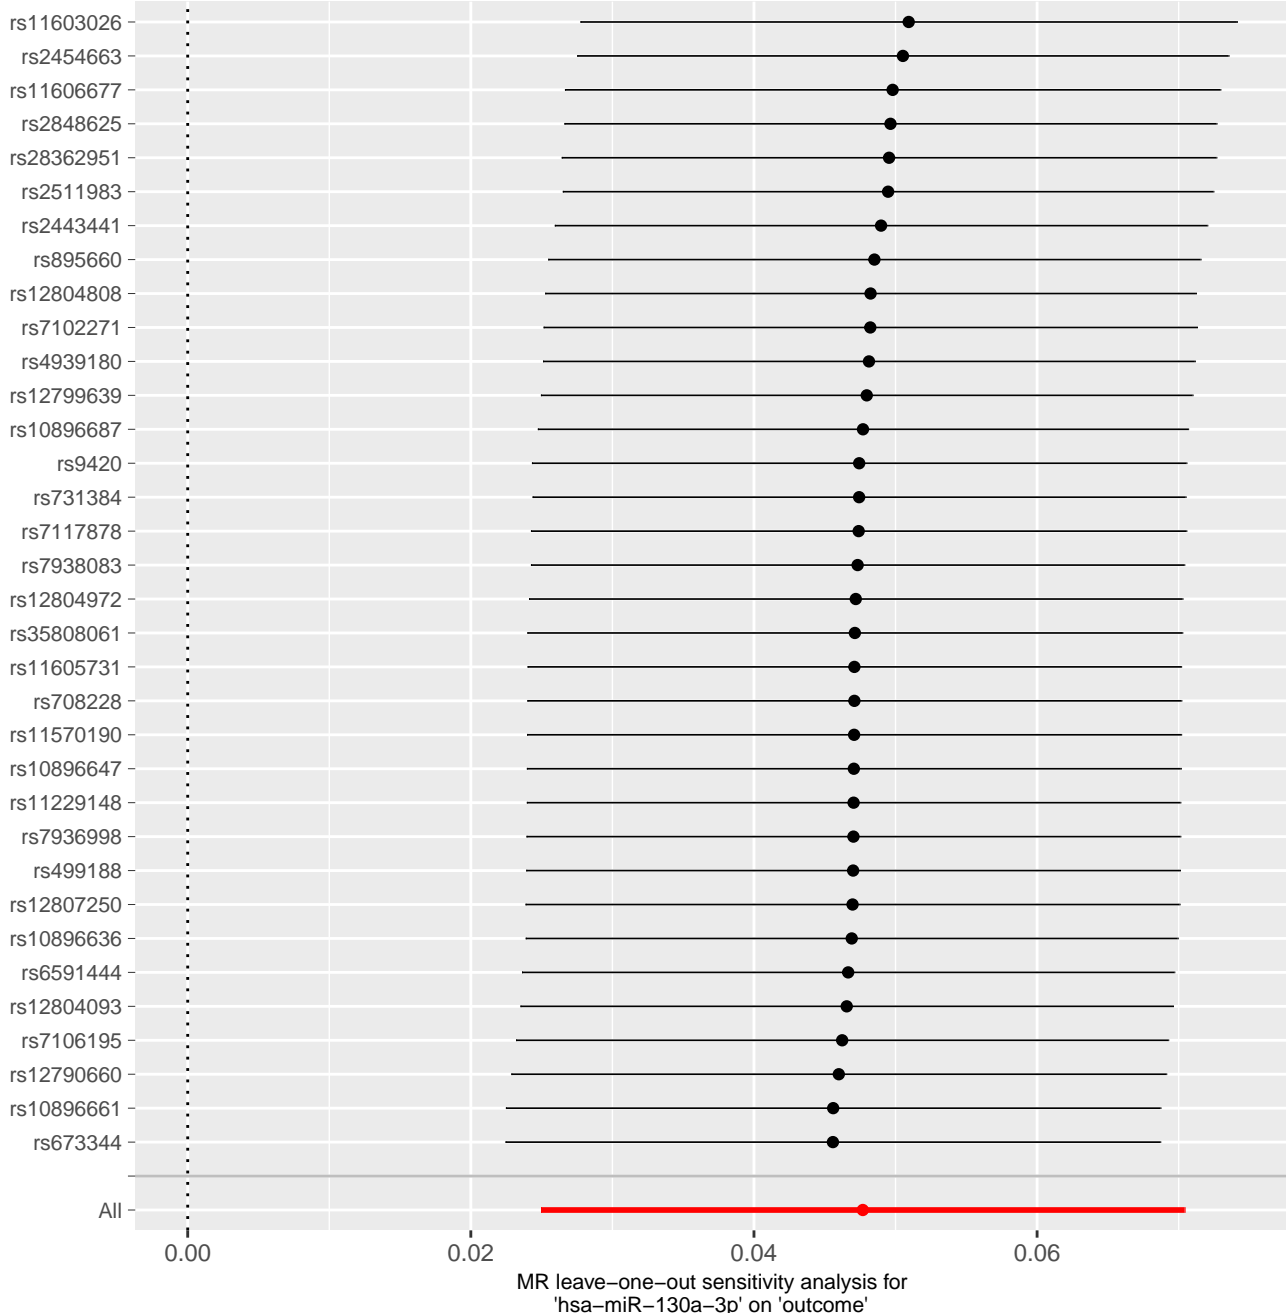

Supplement: s1 [file s1]

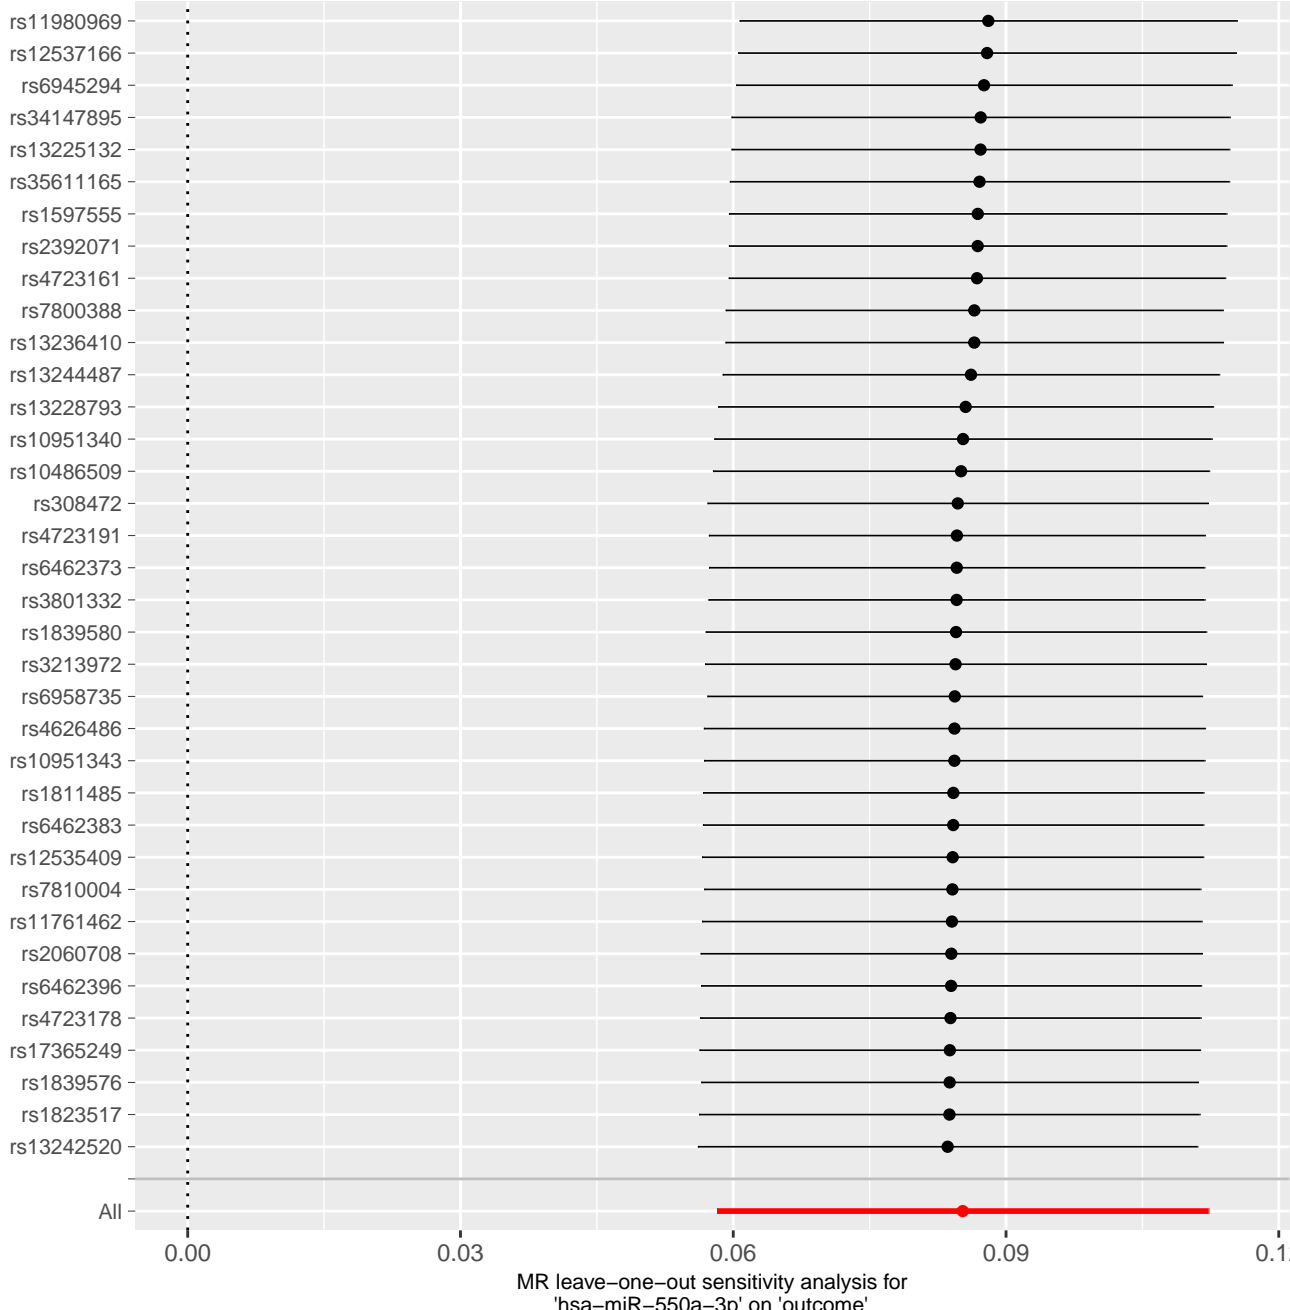

Supplement: s1 [file s1]

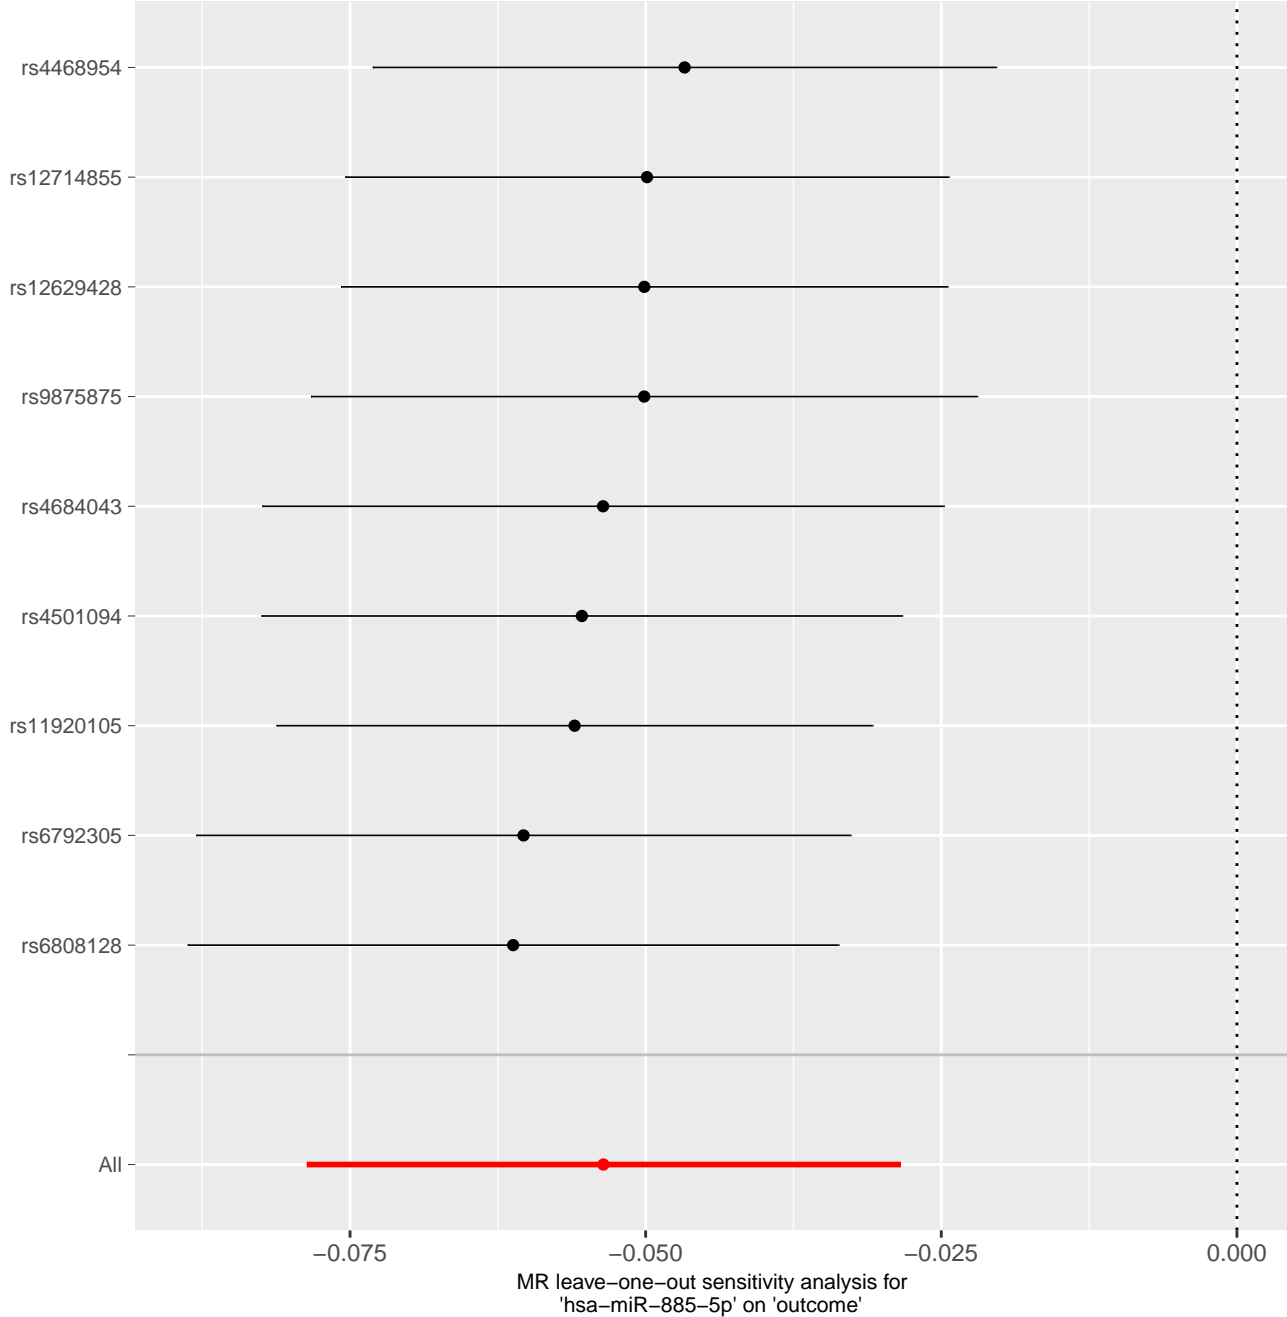

Supplement: s1 [file s1]

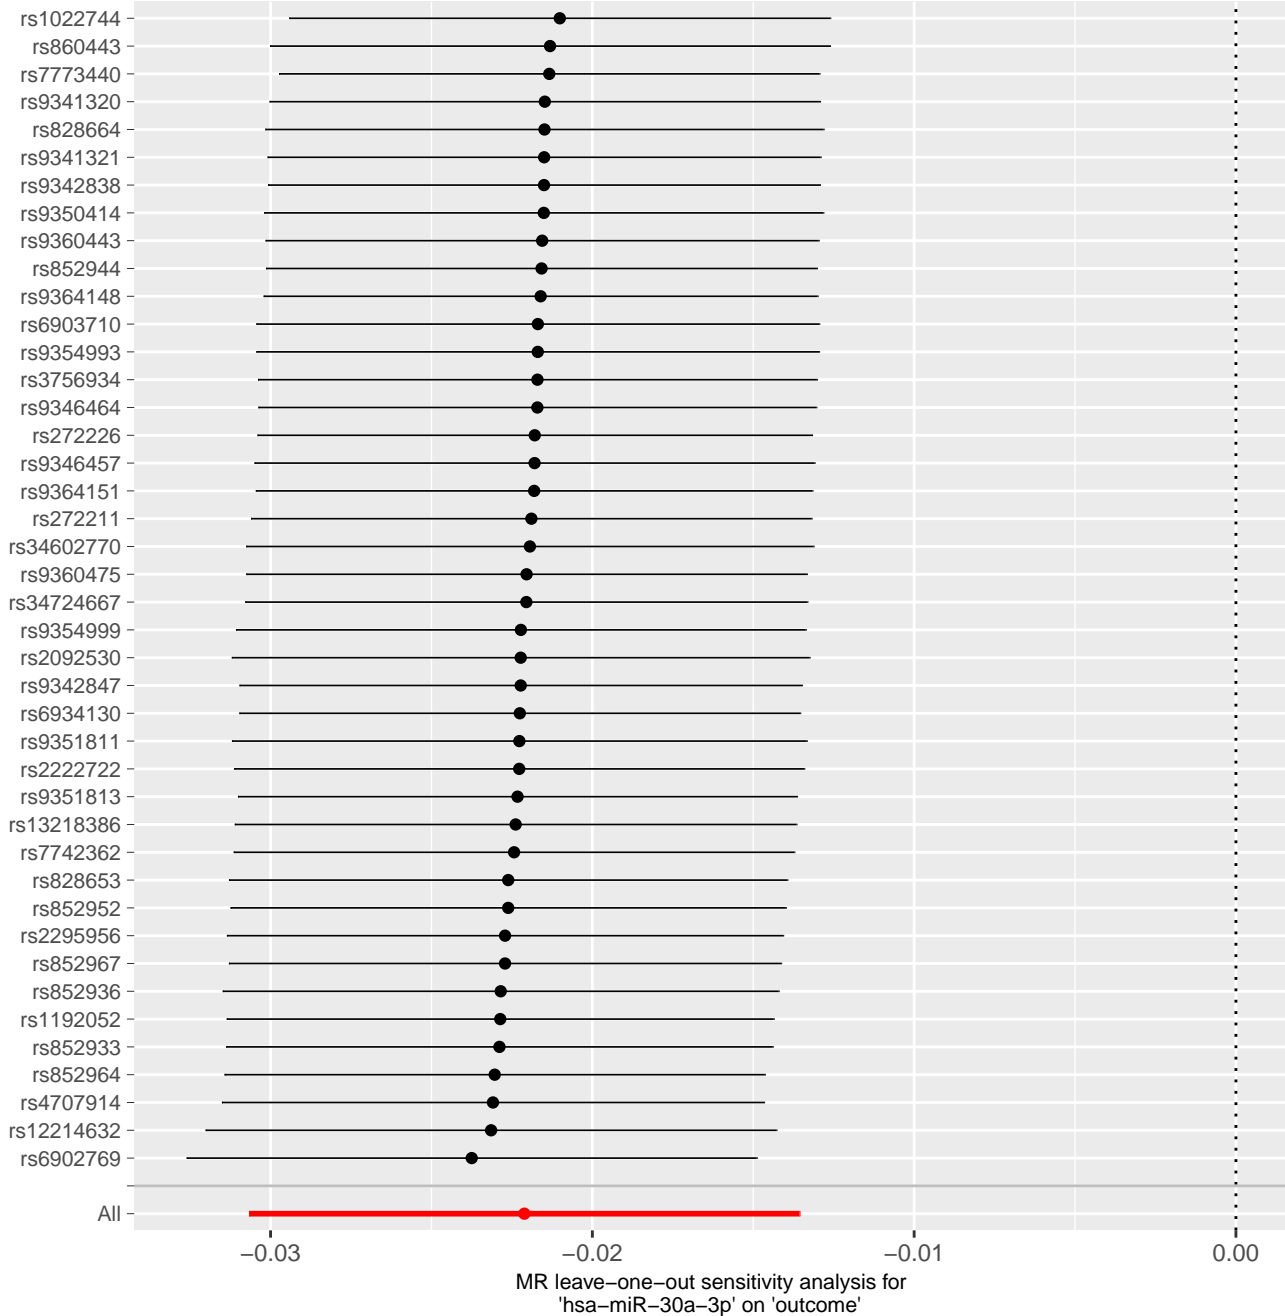

Supplement: s1 [file s1]

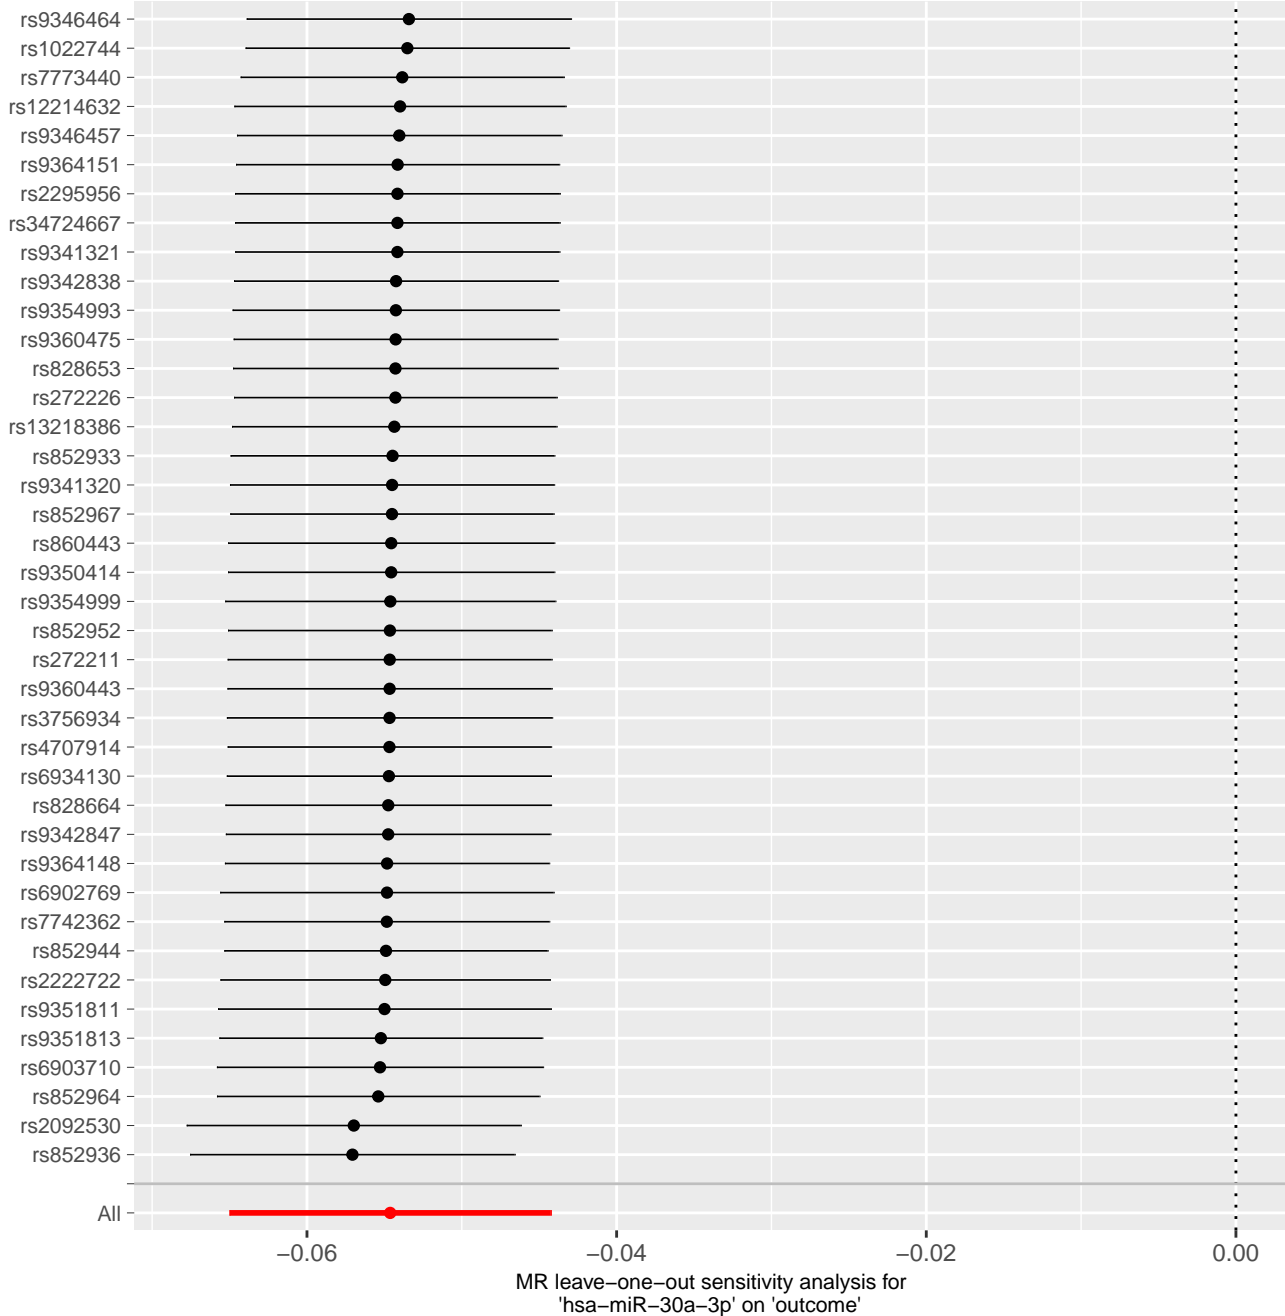

Supplement: s1 [file s1]

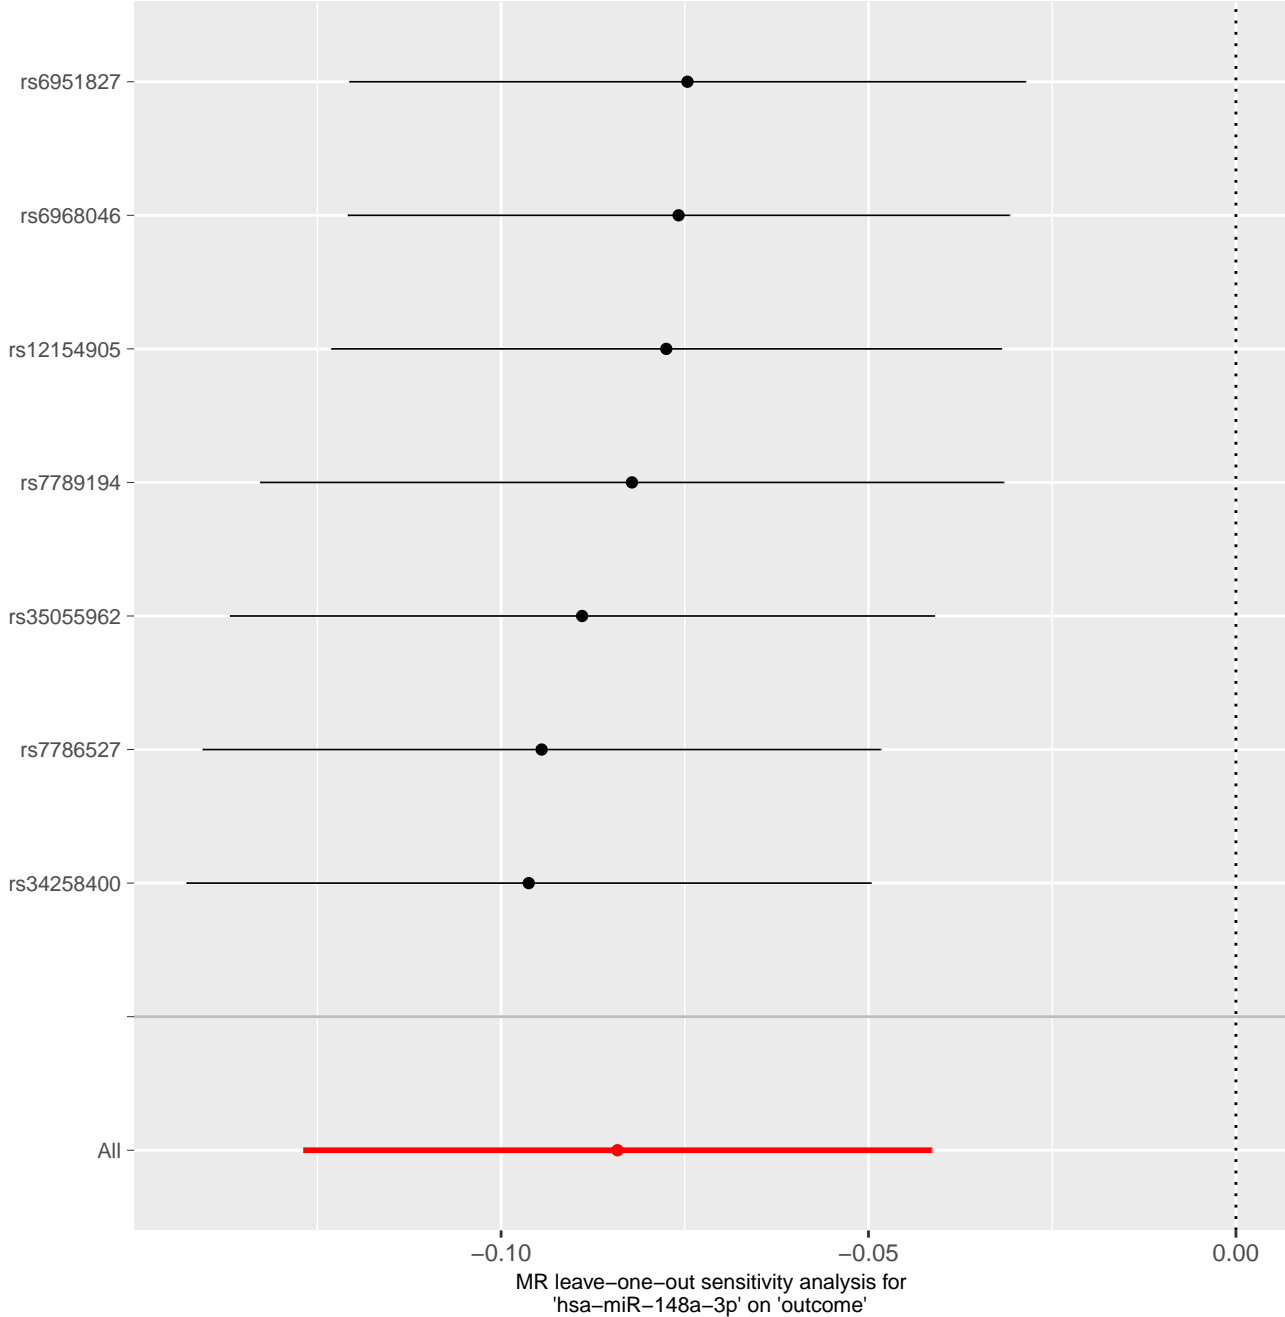

Supplement: s1 [file s1]

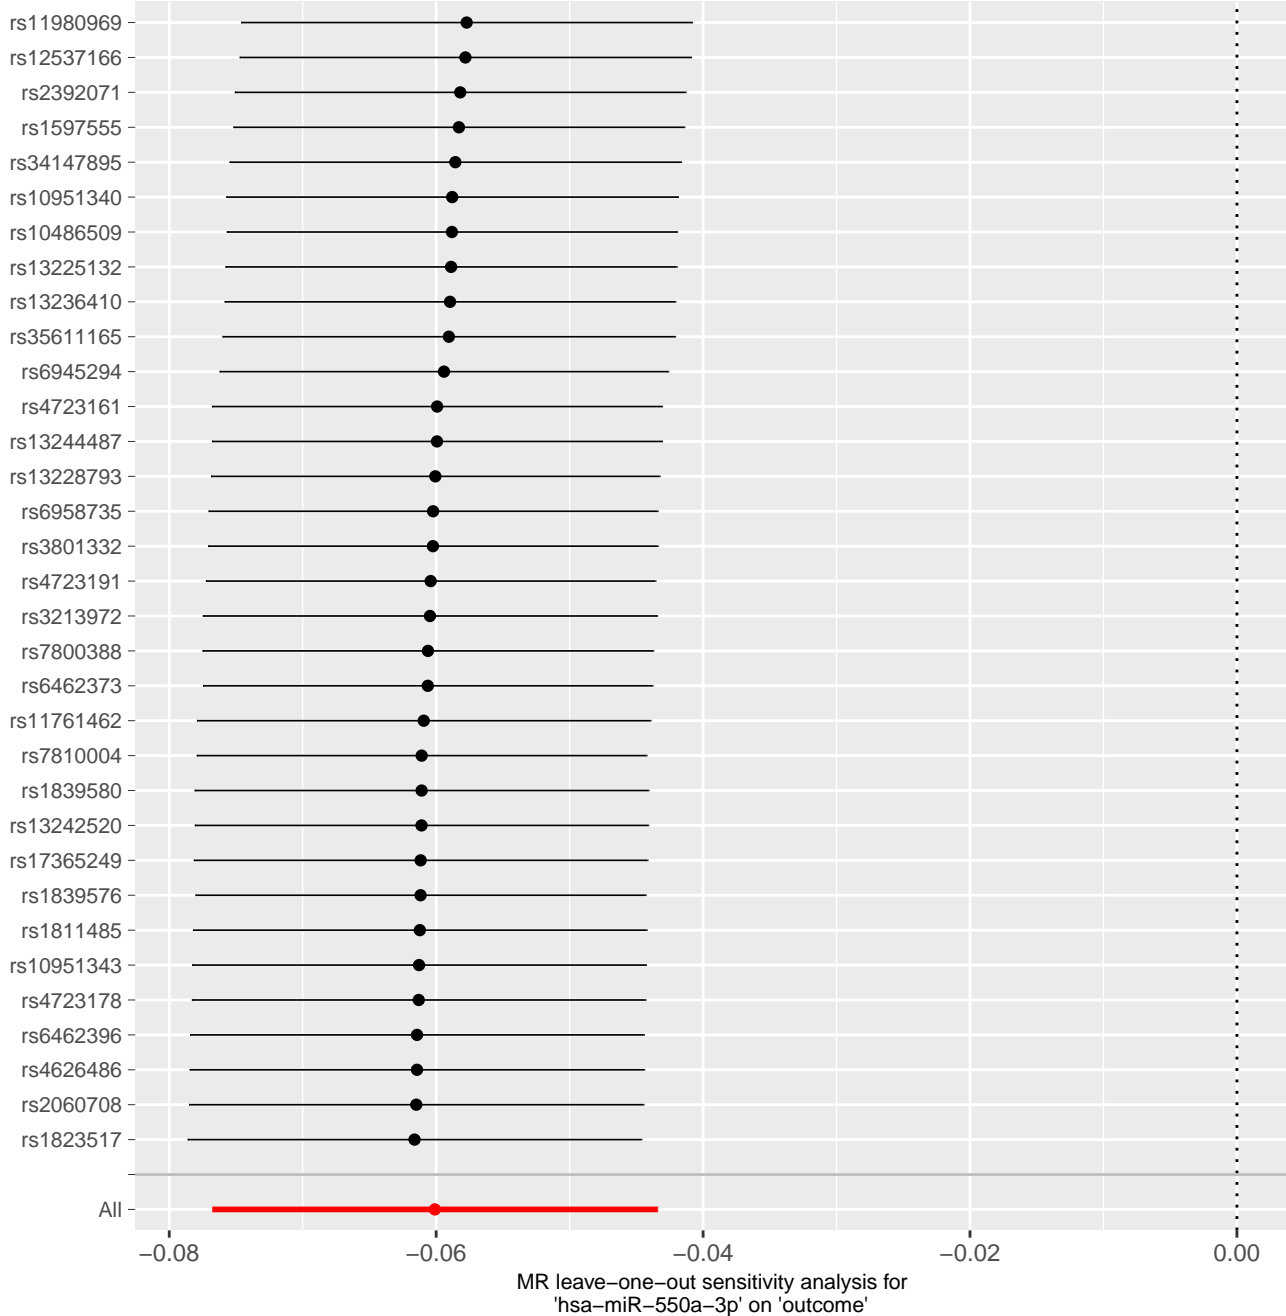

Supplement: s1 [file s1]

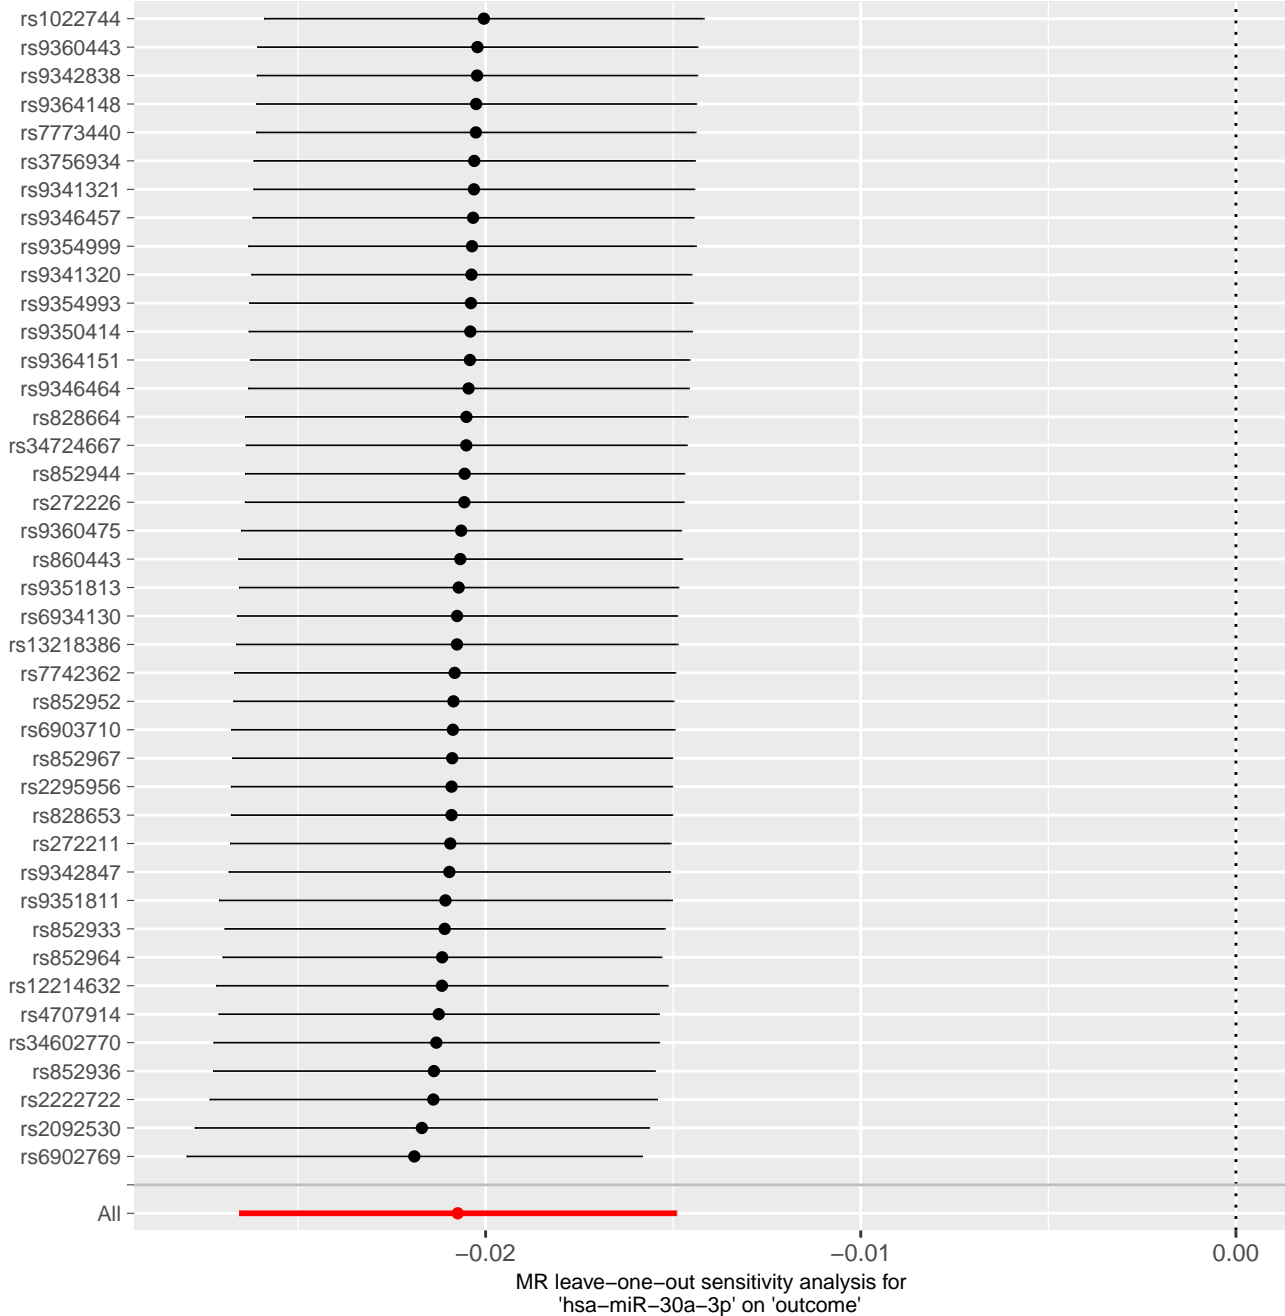

Supplement: s1 [file s1]

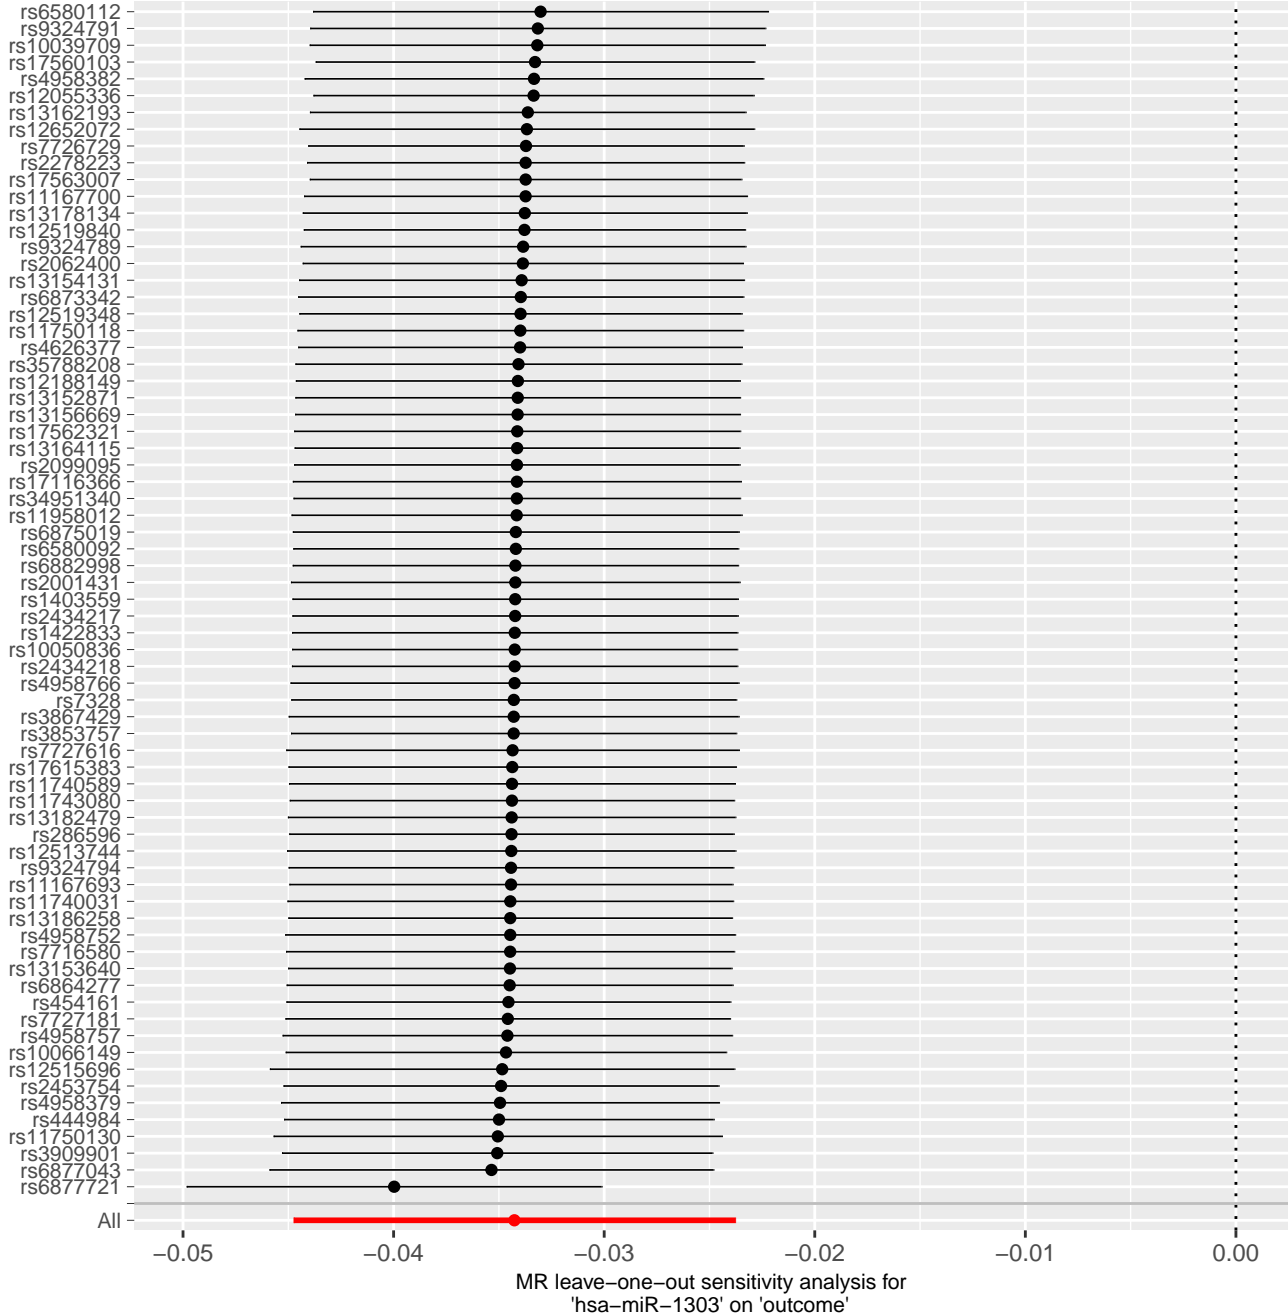

Supplement: s1 [file s1]

rs7295530

rs6538758

rs11108757

All

-0.15

-0.10

-0.05

0.00

MR leave-one-out sensitivity analysis for  
'hsa-miR-135a-5p' on 'outcome'

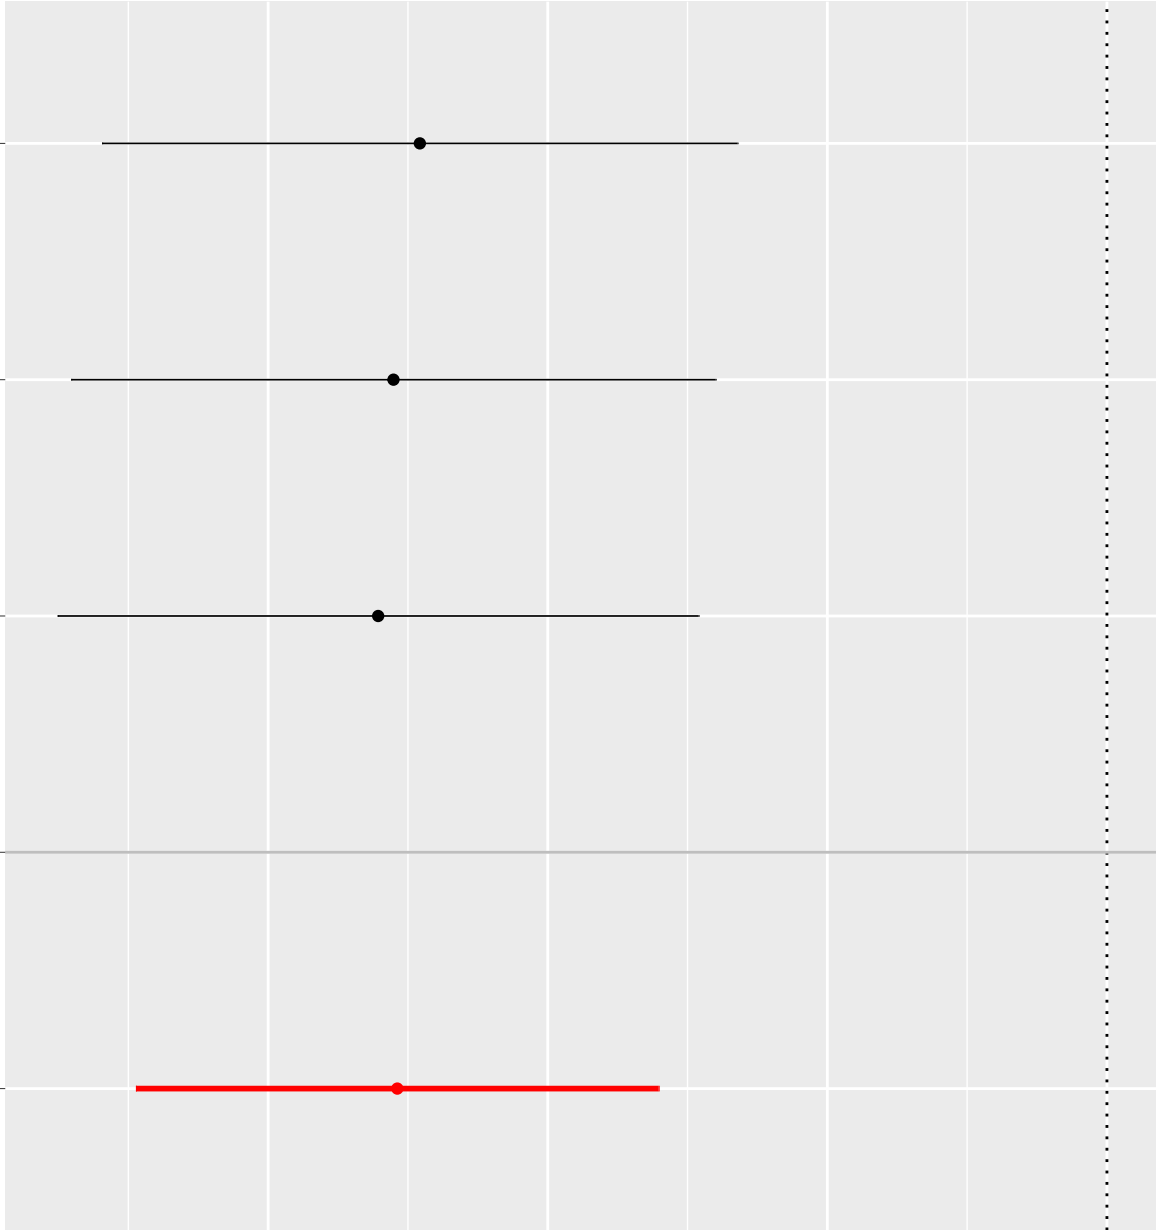

Supplement: s1 [file s1]

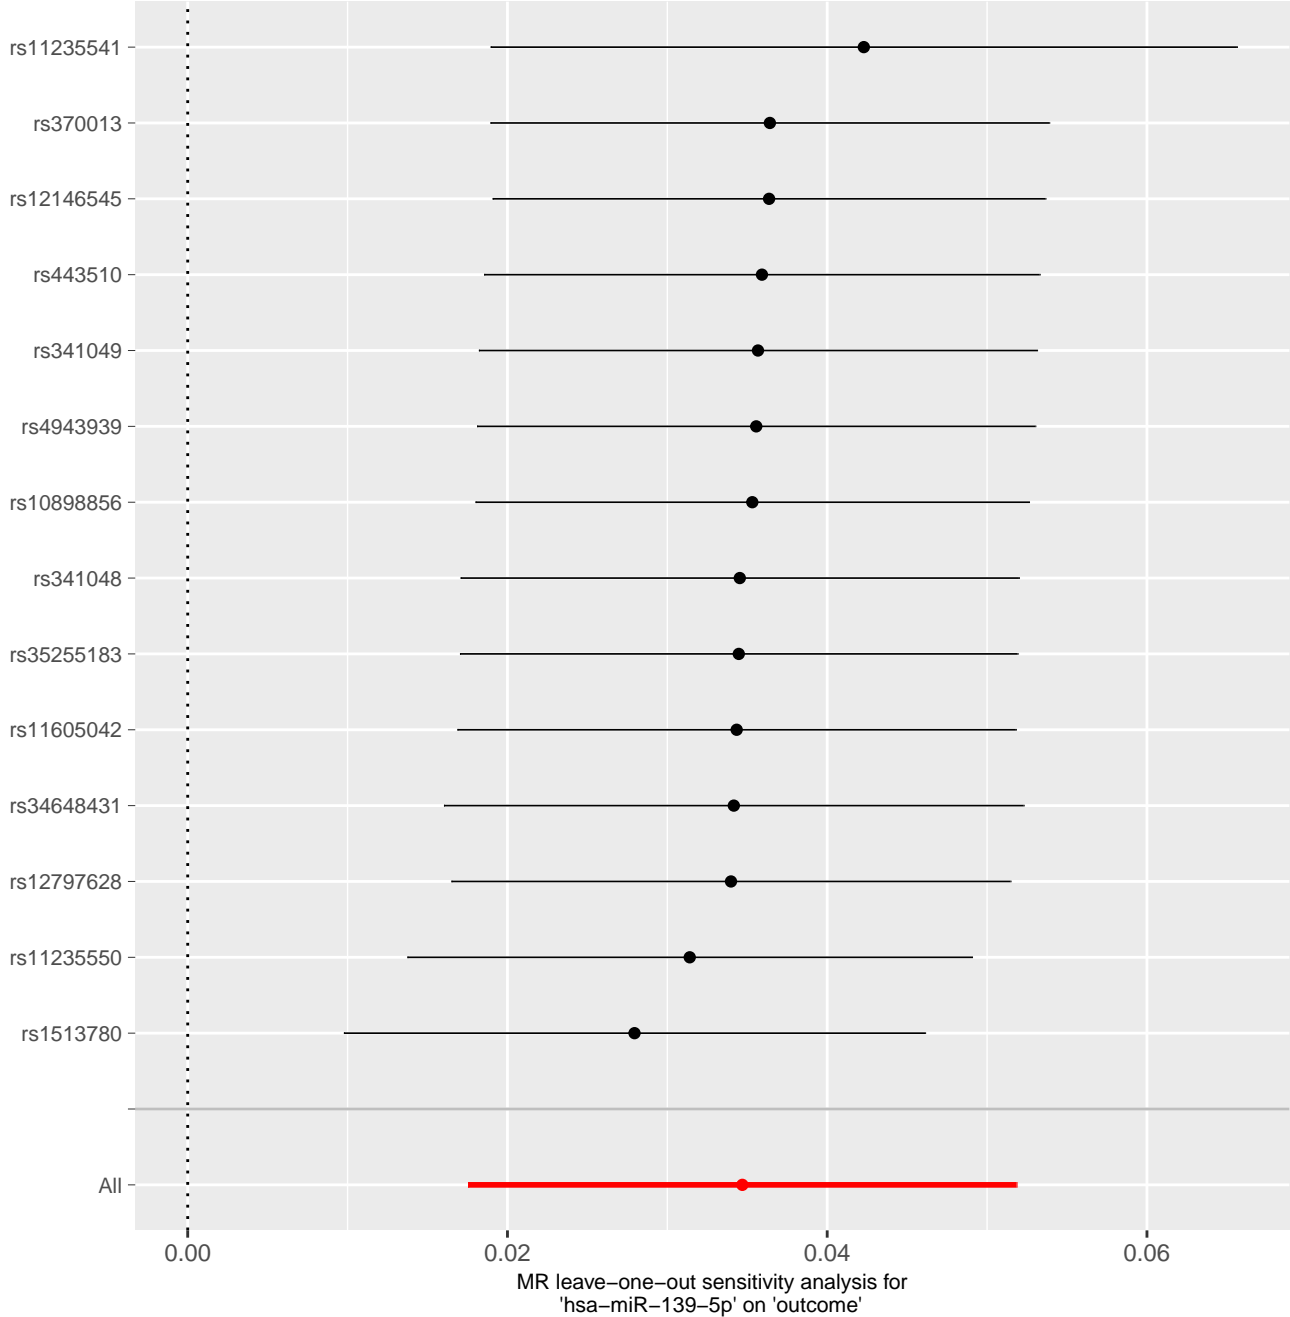

Supplement: s1 [file s1]

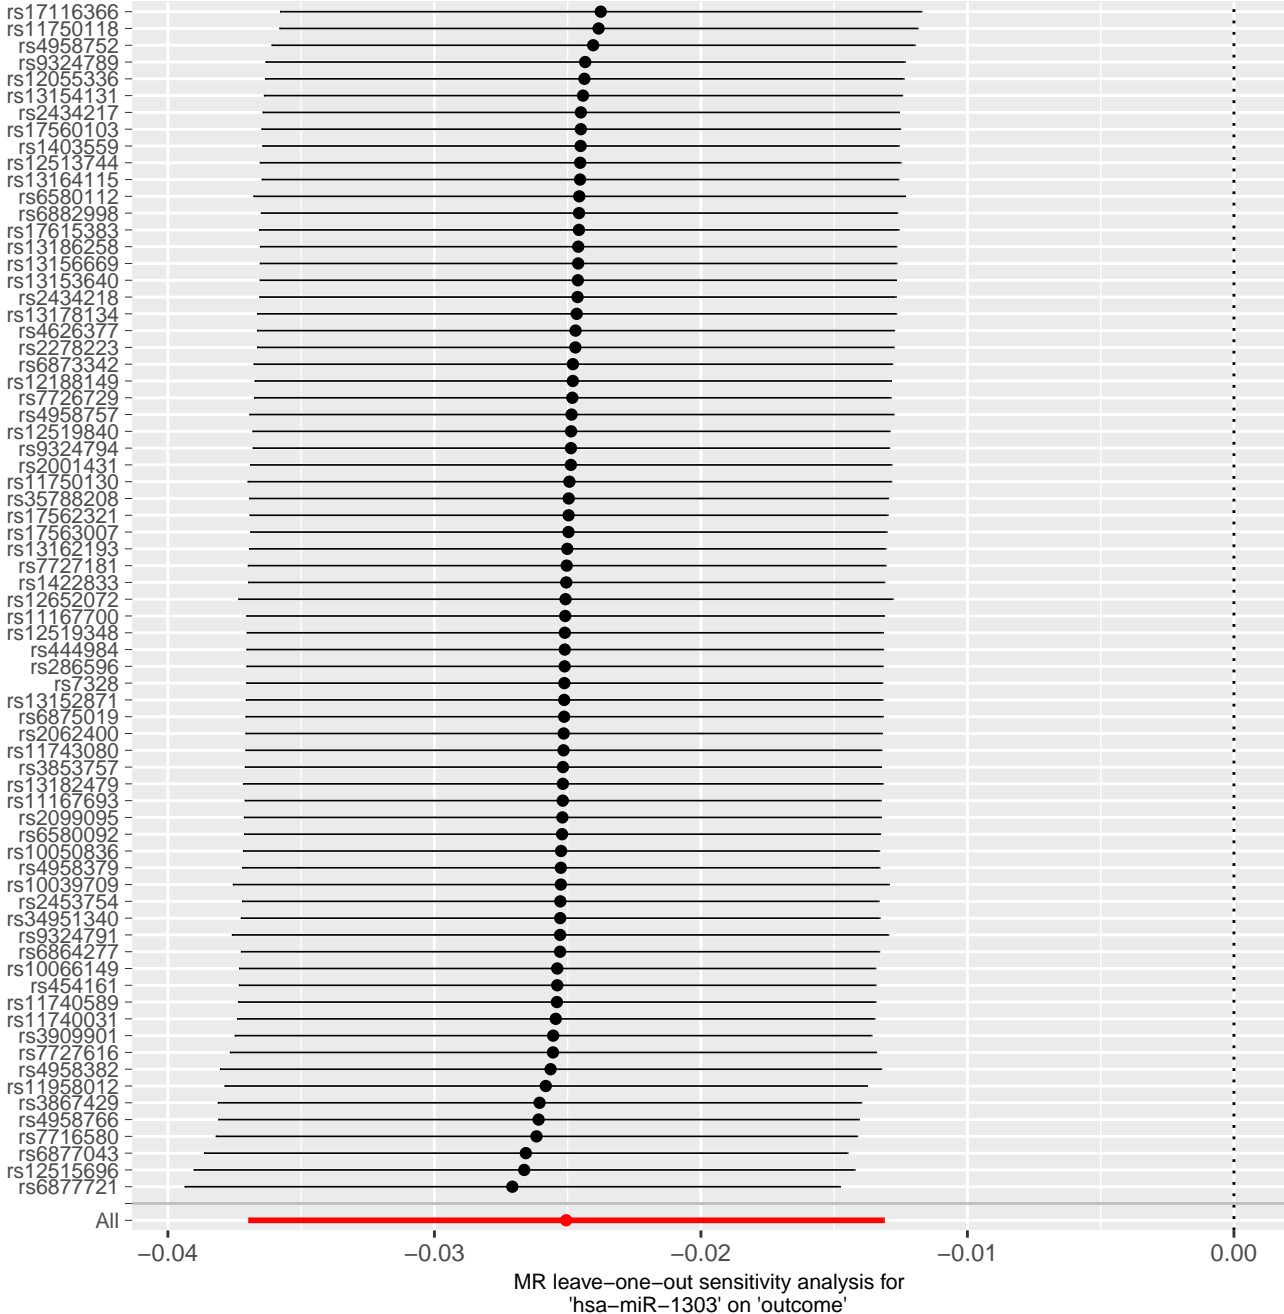

Supplement: s1 [file s1]

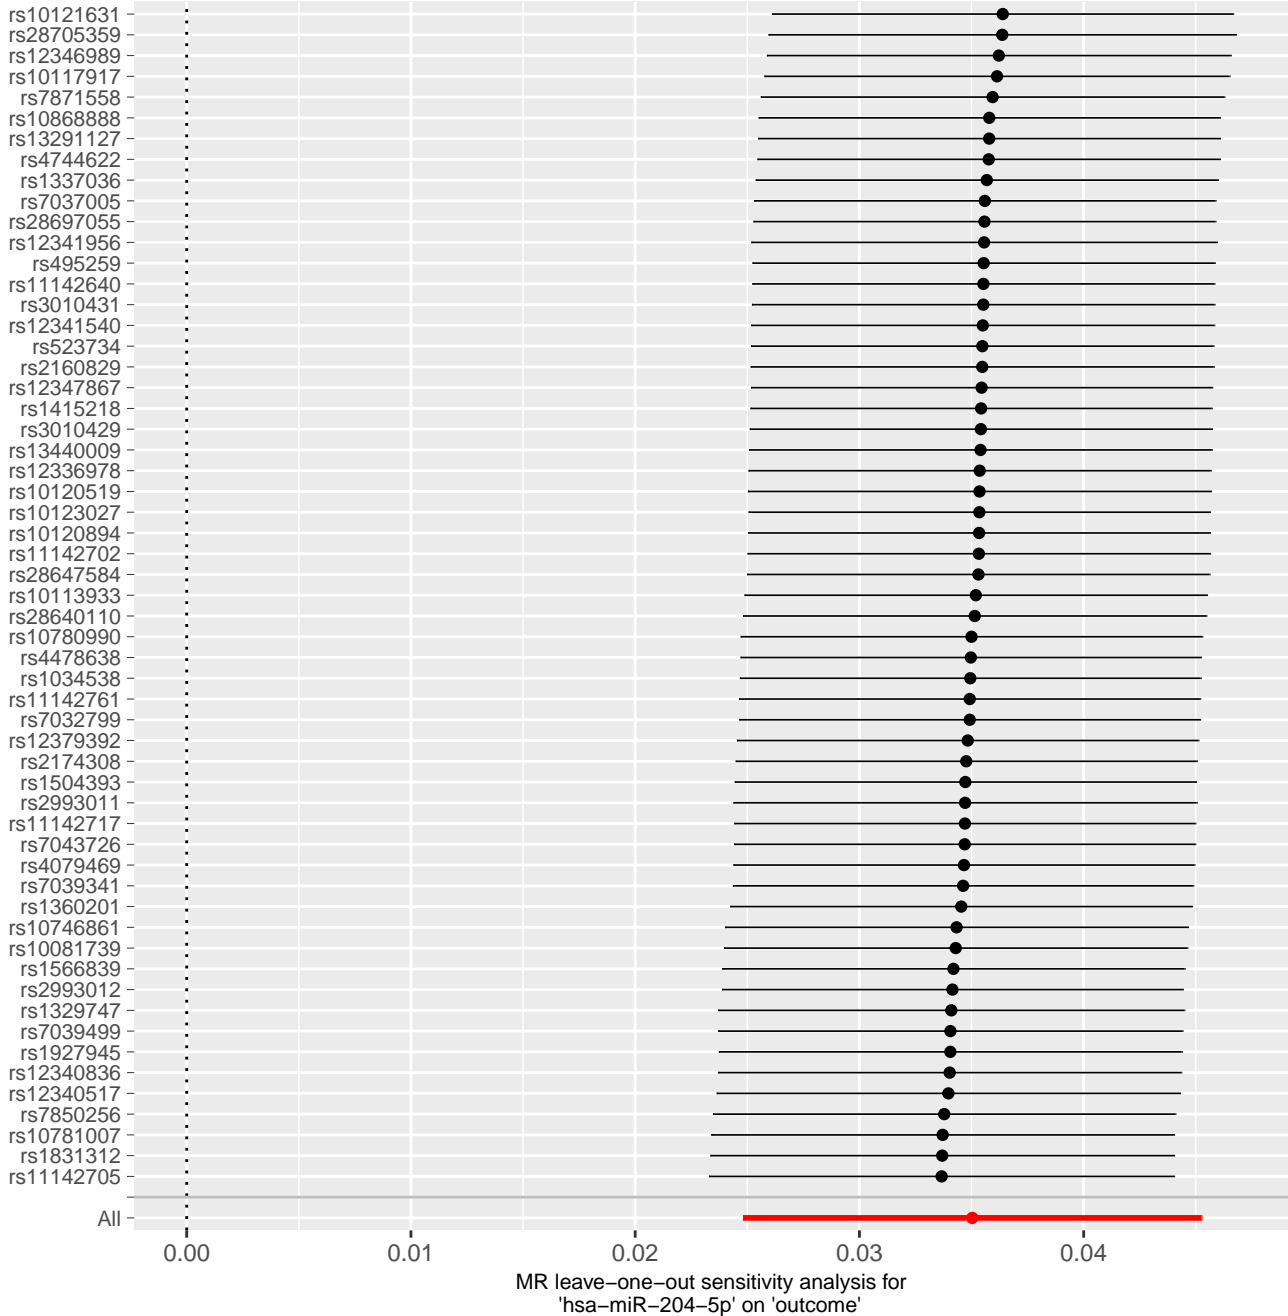

Supplement: s1 [file s1]

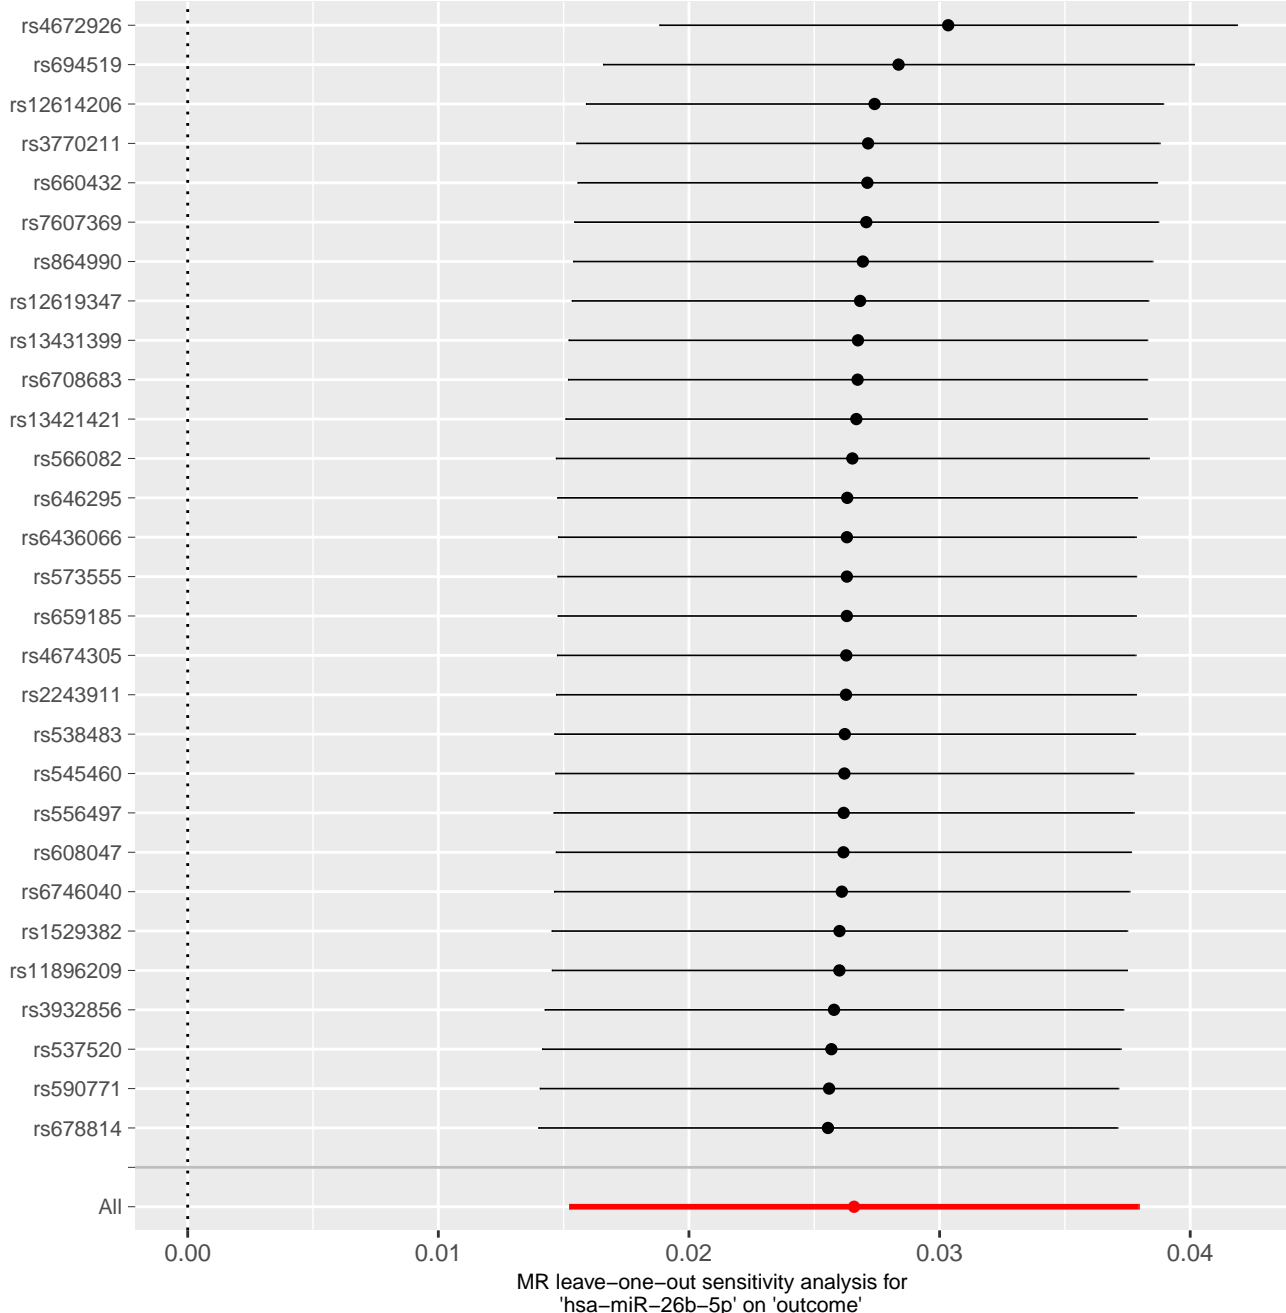

Supplement: s1 [file s1]

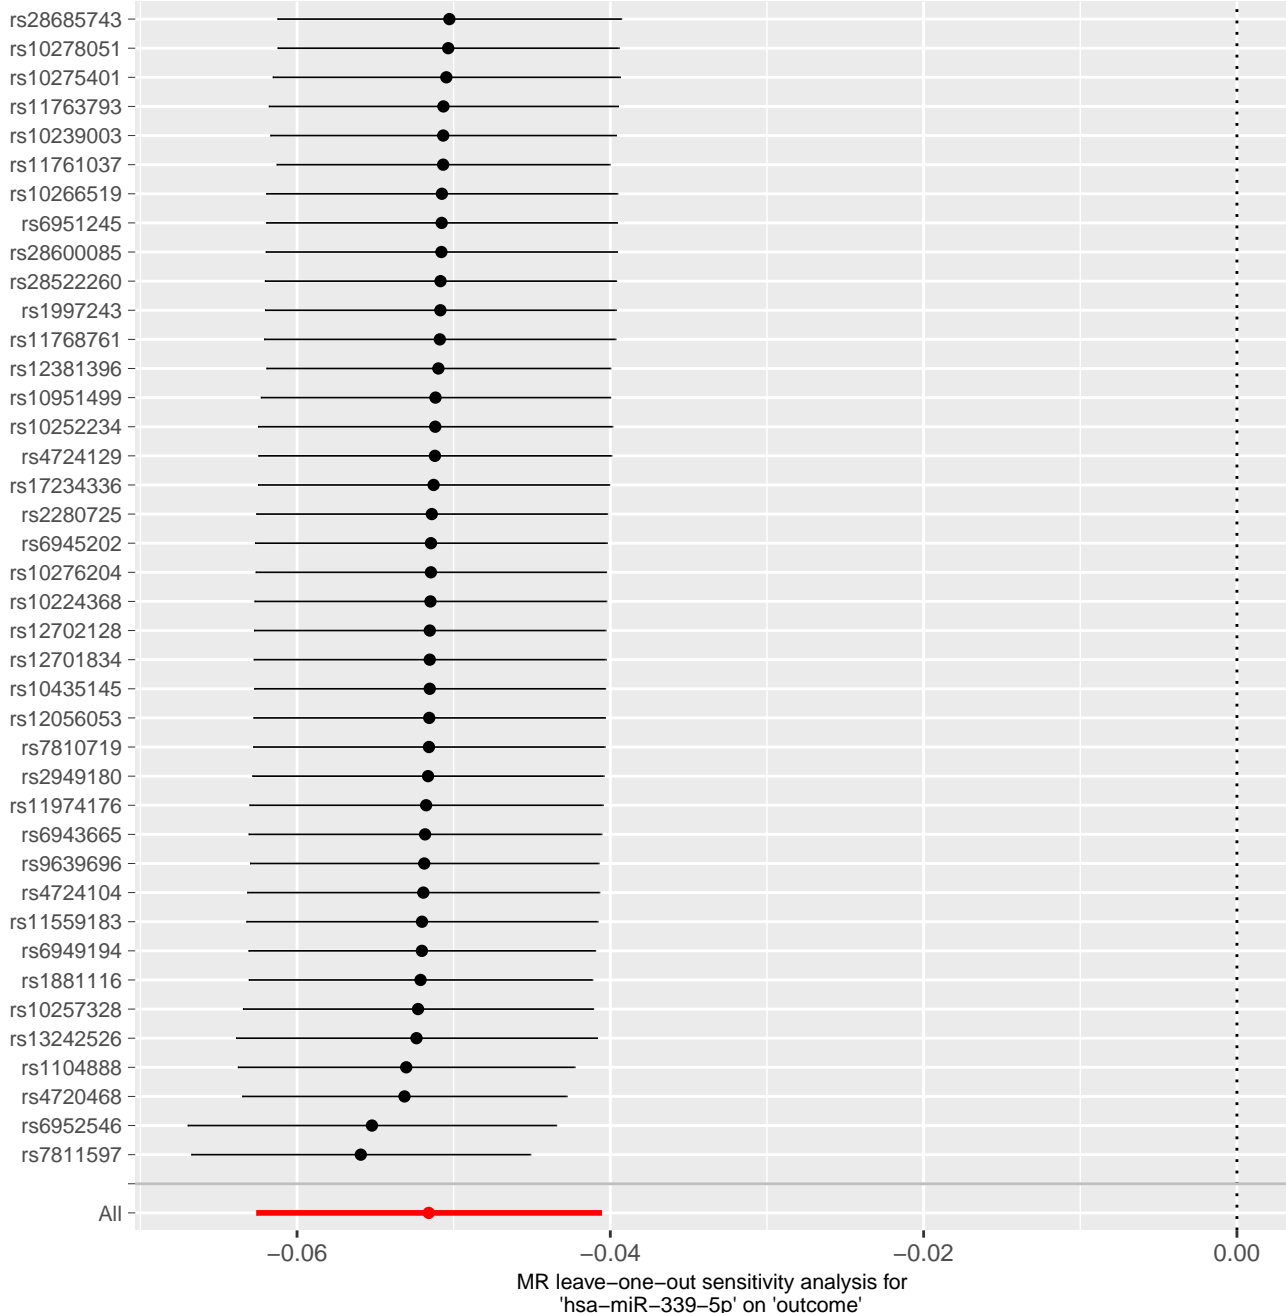

Supplement: s1 [file s1]

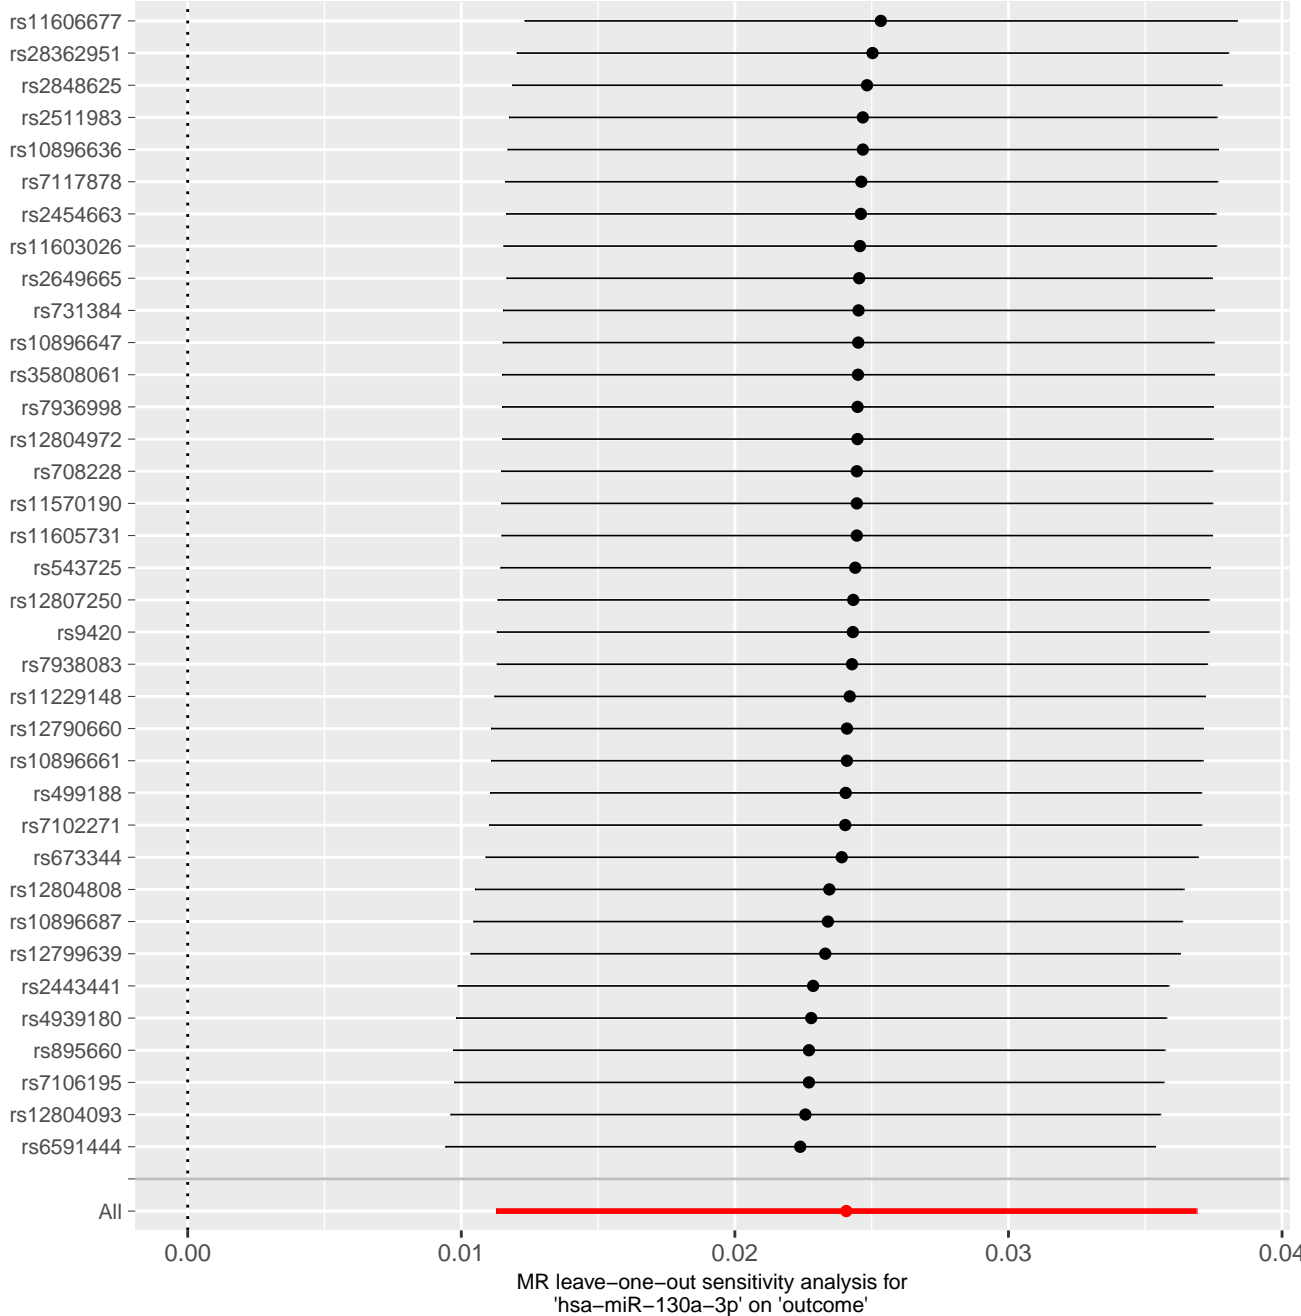

Supplement: s1 [file s1]

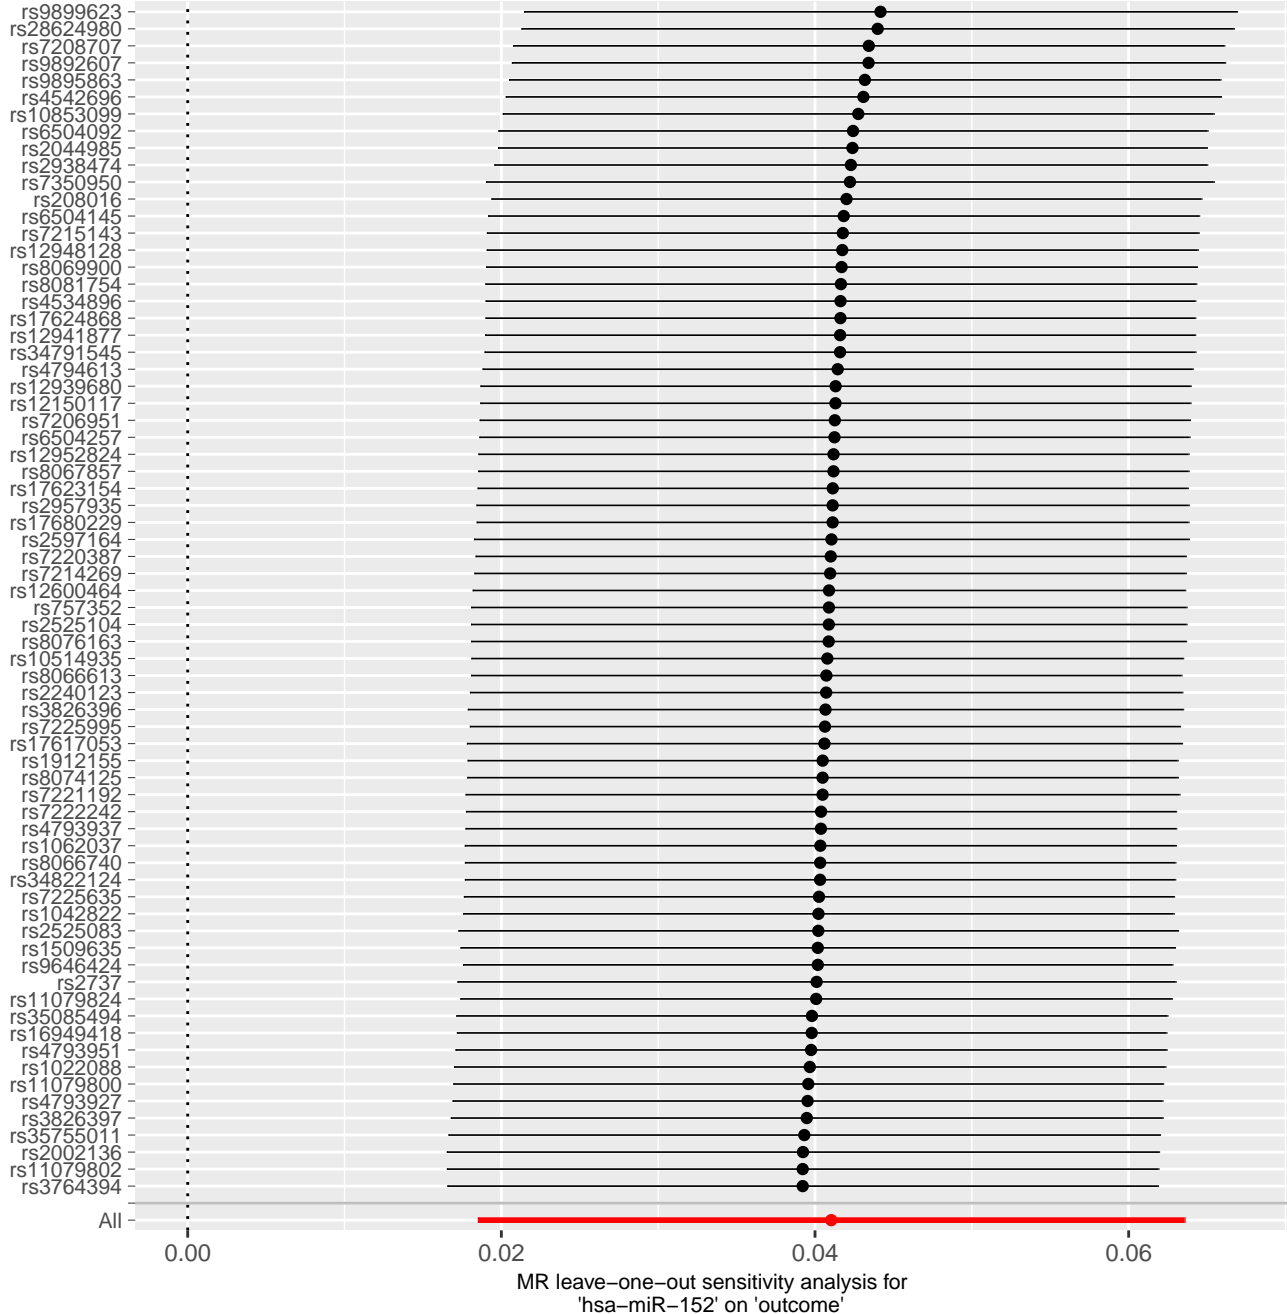

Supplement: s1 [file s1]

rs7224142

rs2874640

rs2908957

All

0.0

0.2

0.4

0.6

MR leave-one-out sensitivity analysis for  
'hsa-miR-744-5p' on 'outcome'

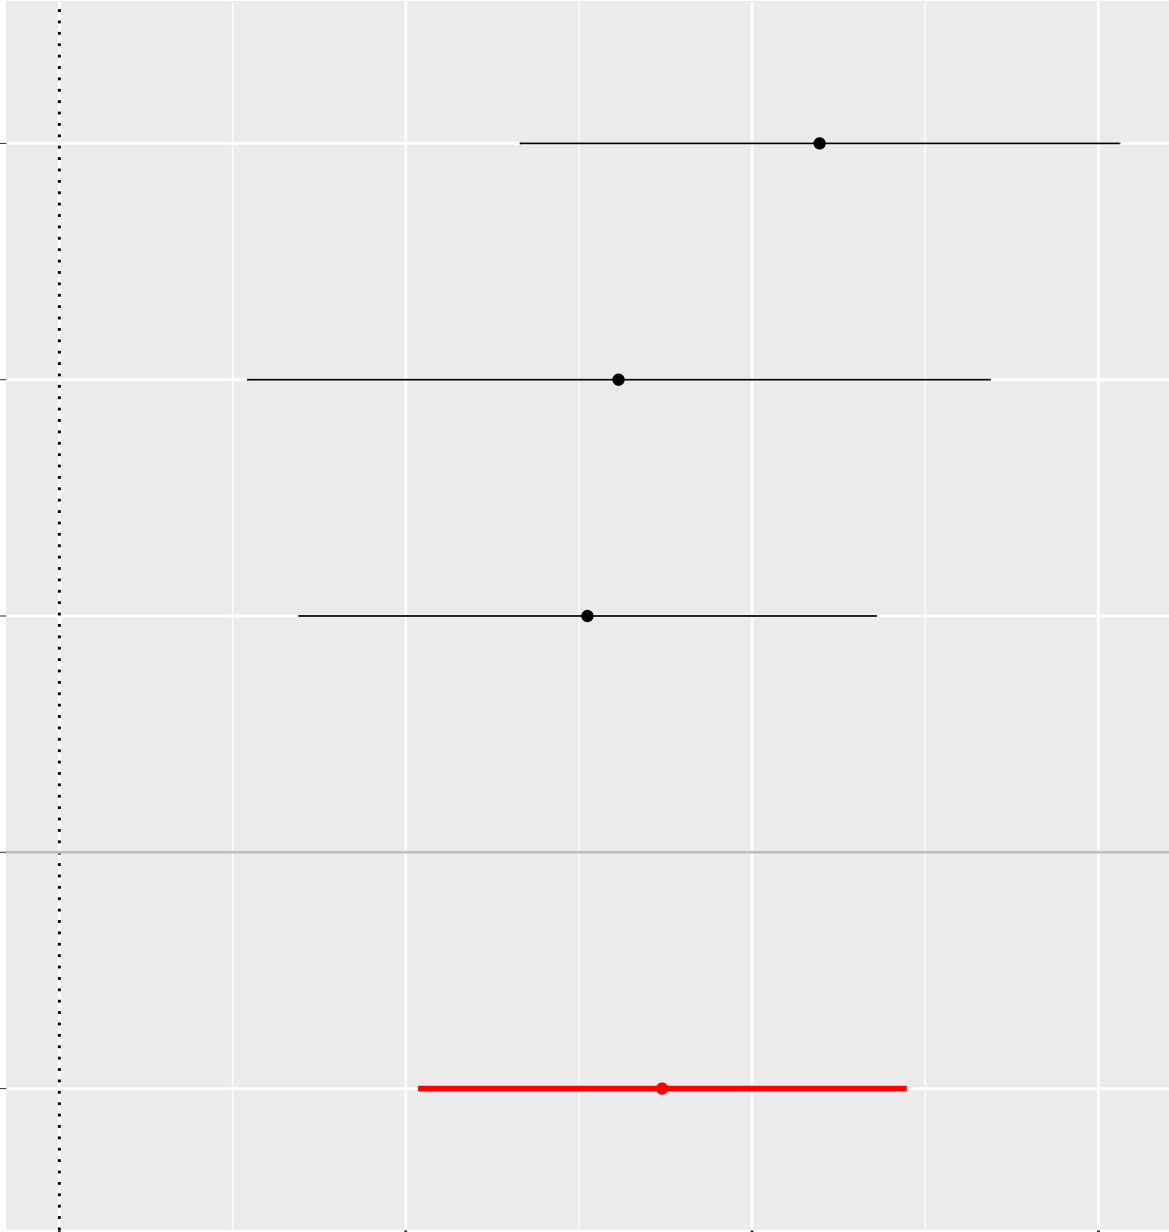

Supplement: s1 [file s1]

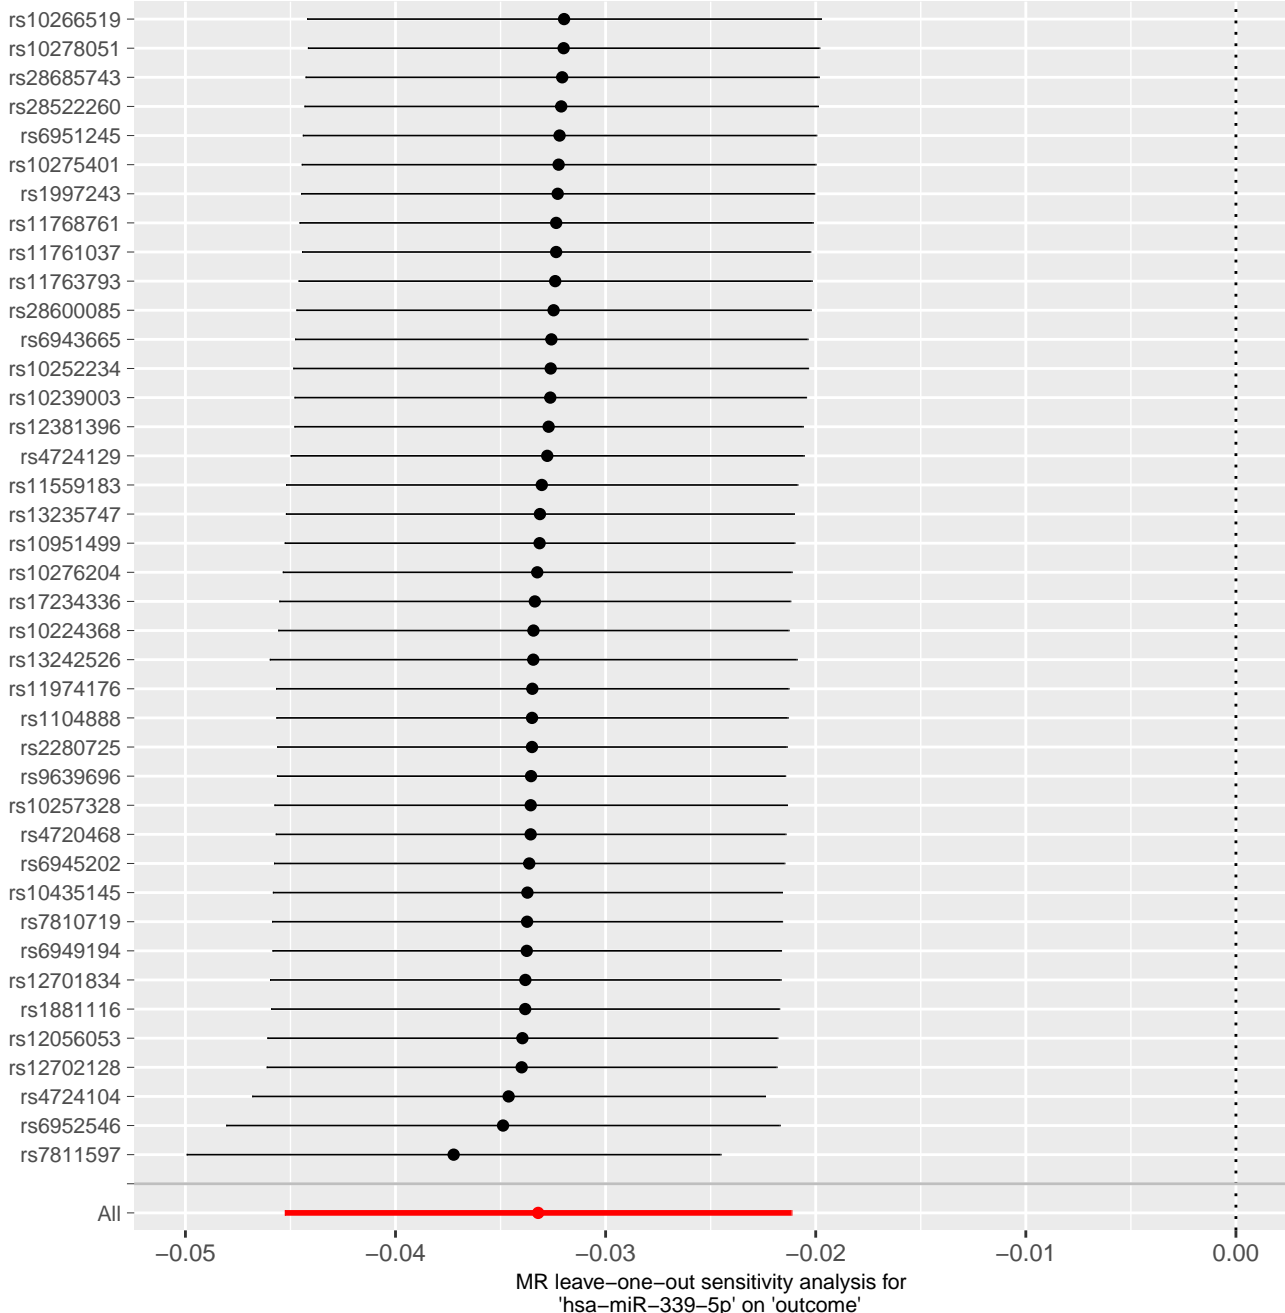

Supplement: s1 [file s1]

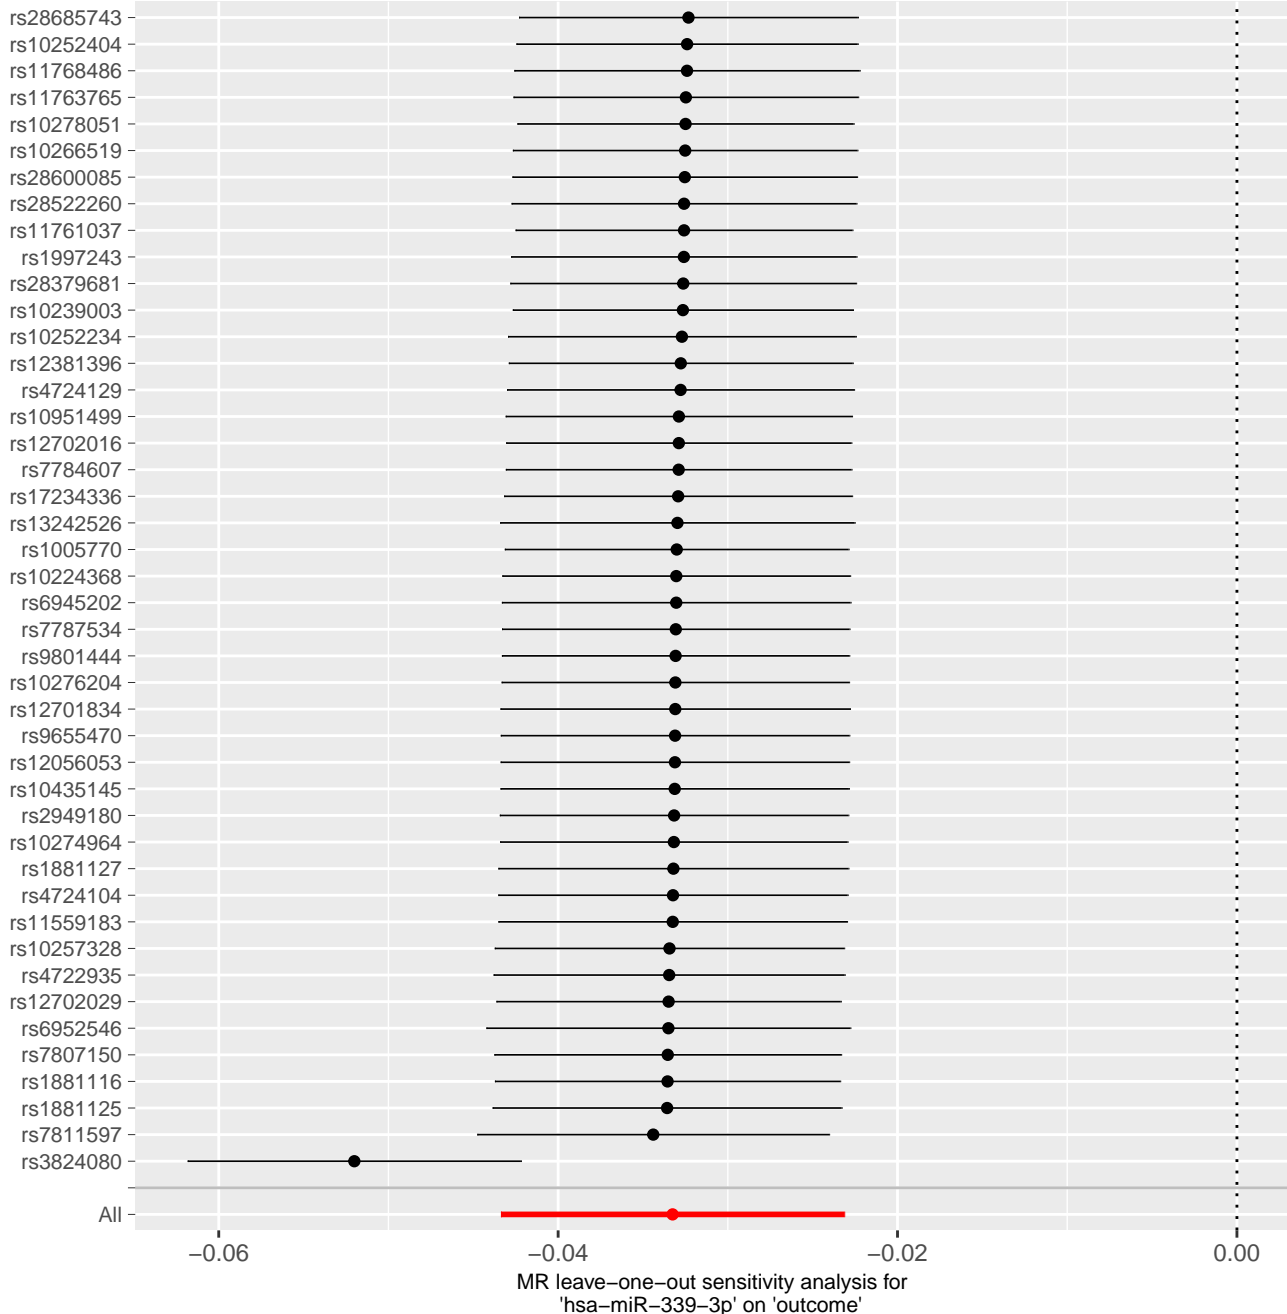

Supplement: s1 [file s1]

rs7295530

rs11108757

rs6538758

All

-0.20

-0.15

-0.10

-0.05

0.00

MR leave-one-out sensitivity analysis for  
'hsa-miR-135a-5p' on 'outcome'

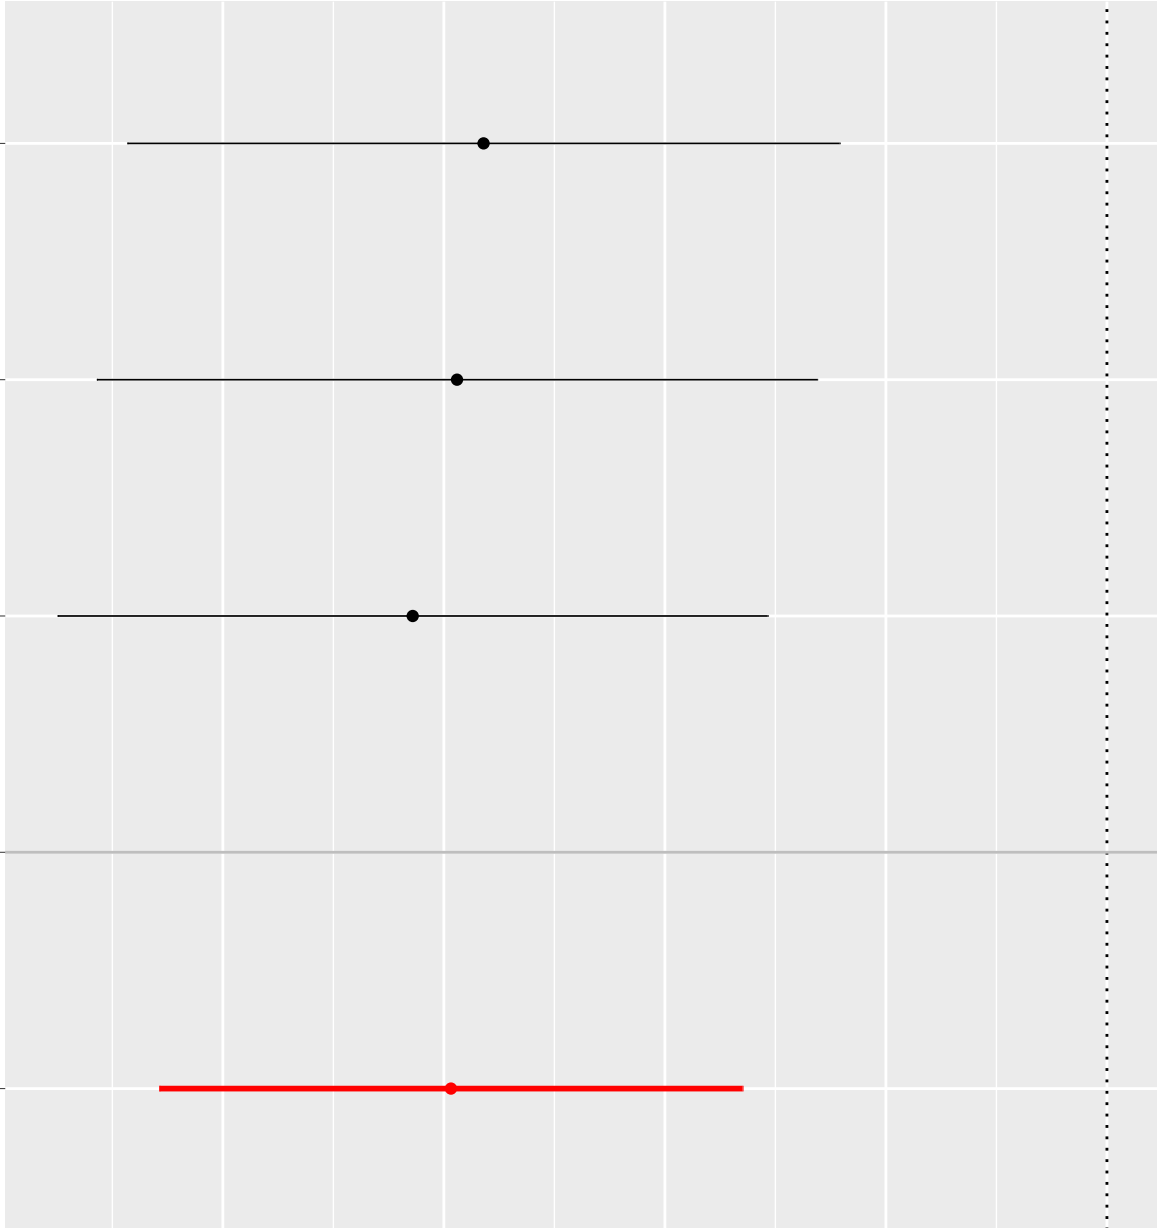

Supplement: s1 [file s1]
